# Supplementary material for: HIF-1α exerts a double-edged sword regulatory role in hippocampal neuronal PANoptosis of Alzheimer's disease through HK2/VDAC1/NLRP3 axis and RIPK3 signal
Source: Research Square preprint supplement (doi:10.21203/rs.3.rs-7239681/v1), 2025-07-31
Supplement: Supplementary file 1 [file 1a8fd9e47cb3ef8f5c101f9e.docx]

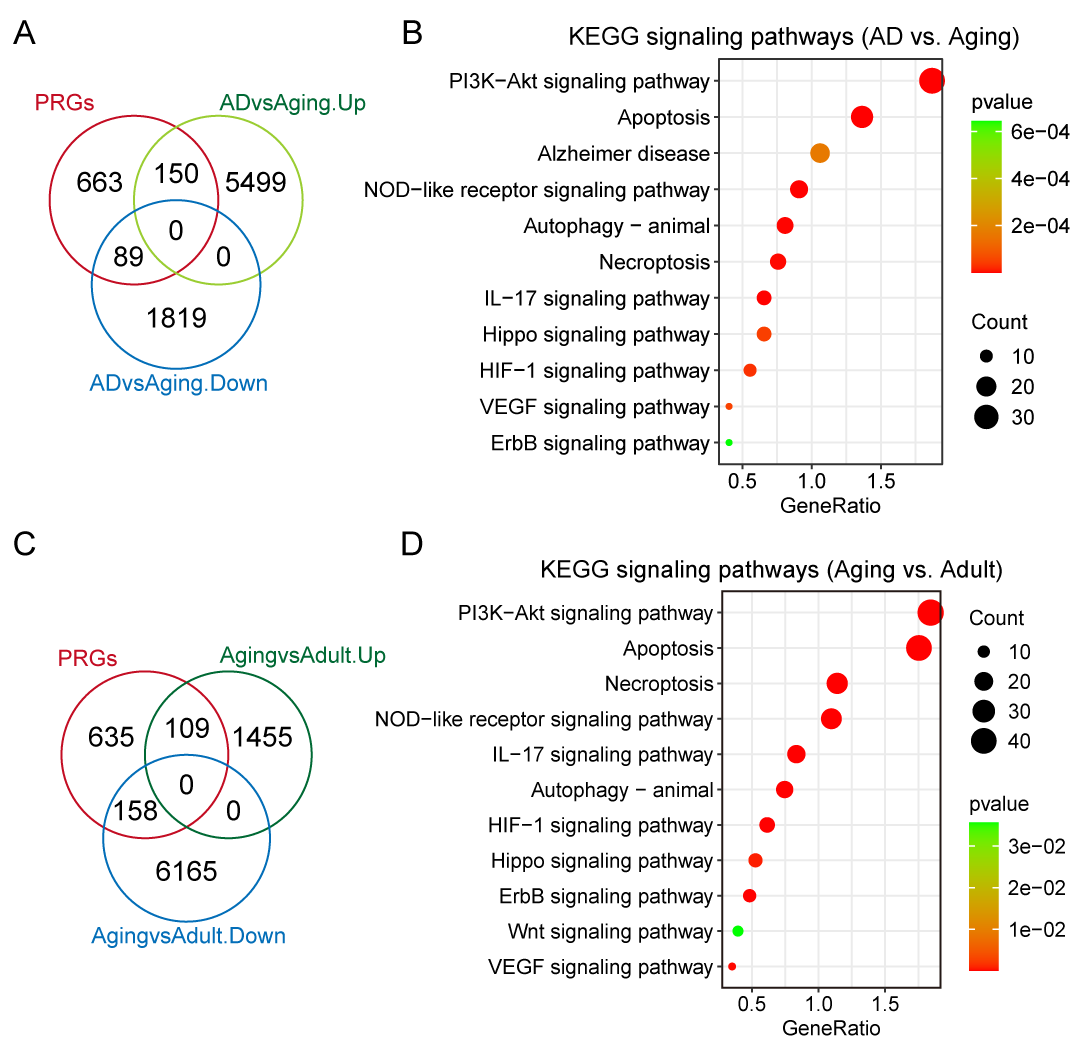


**Supplementary Figure 1**


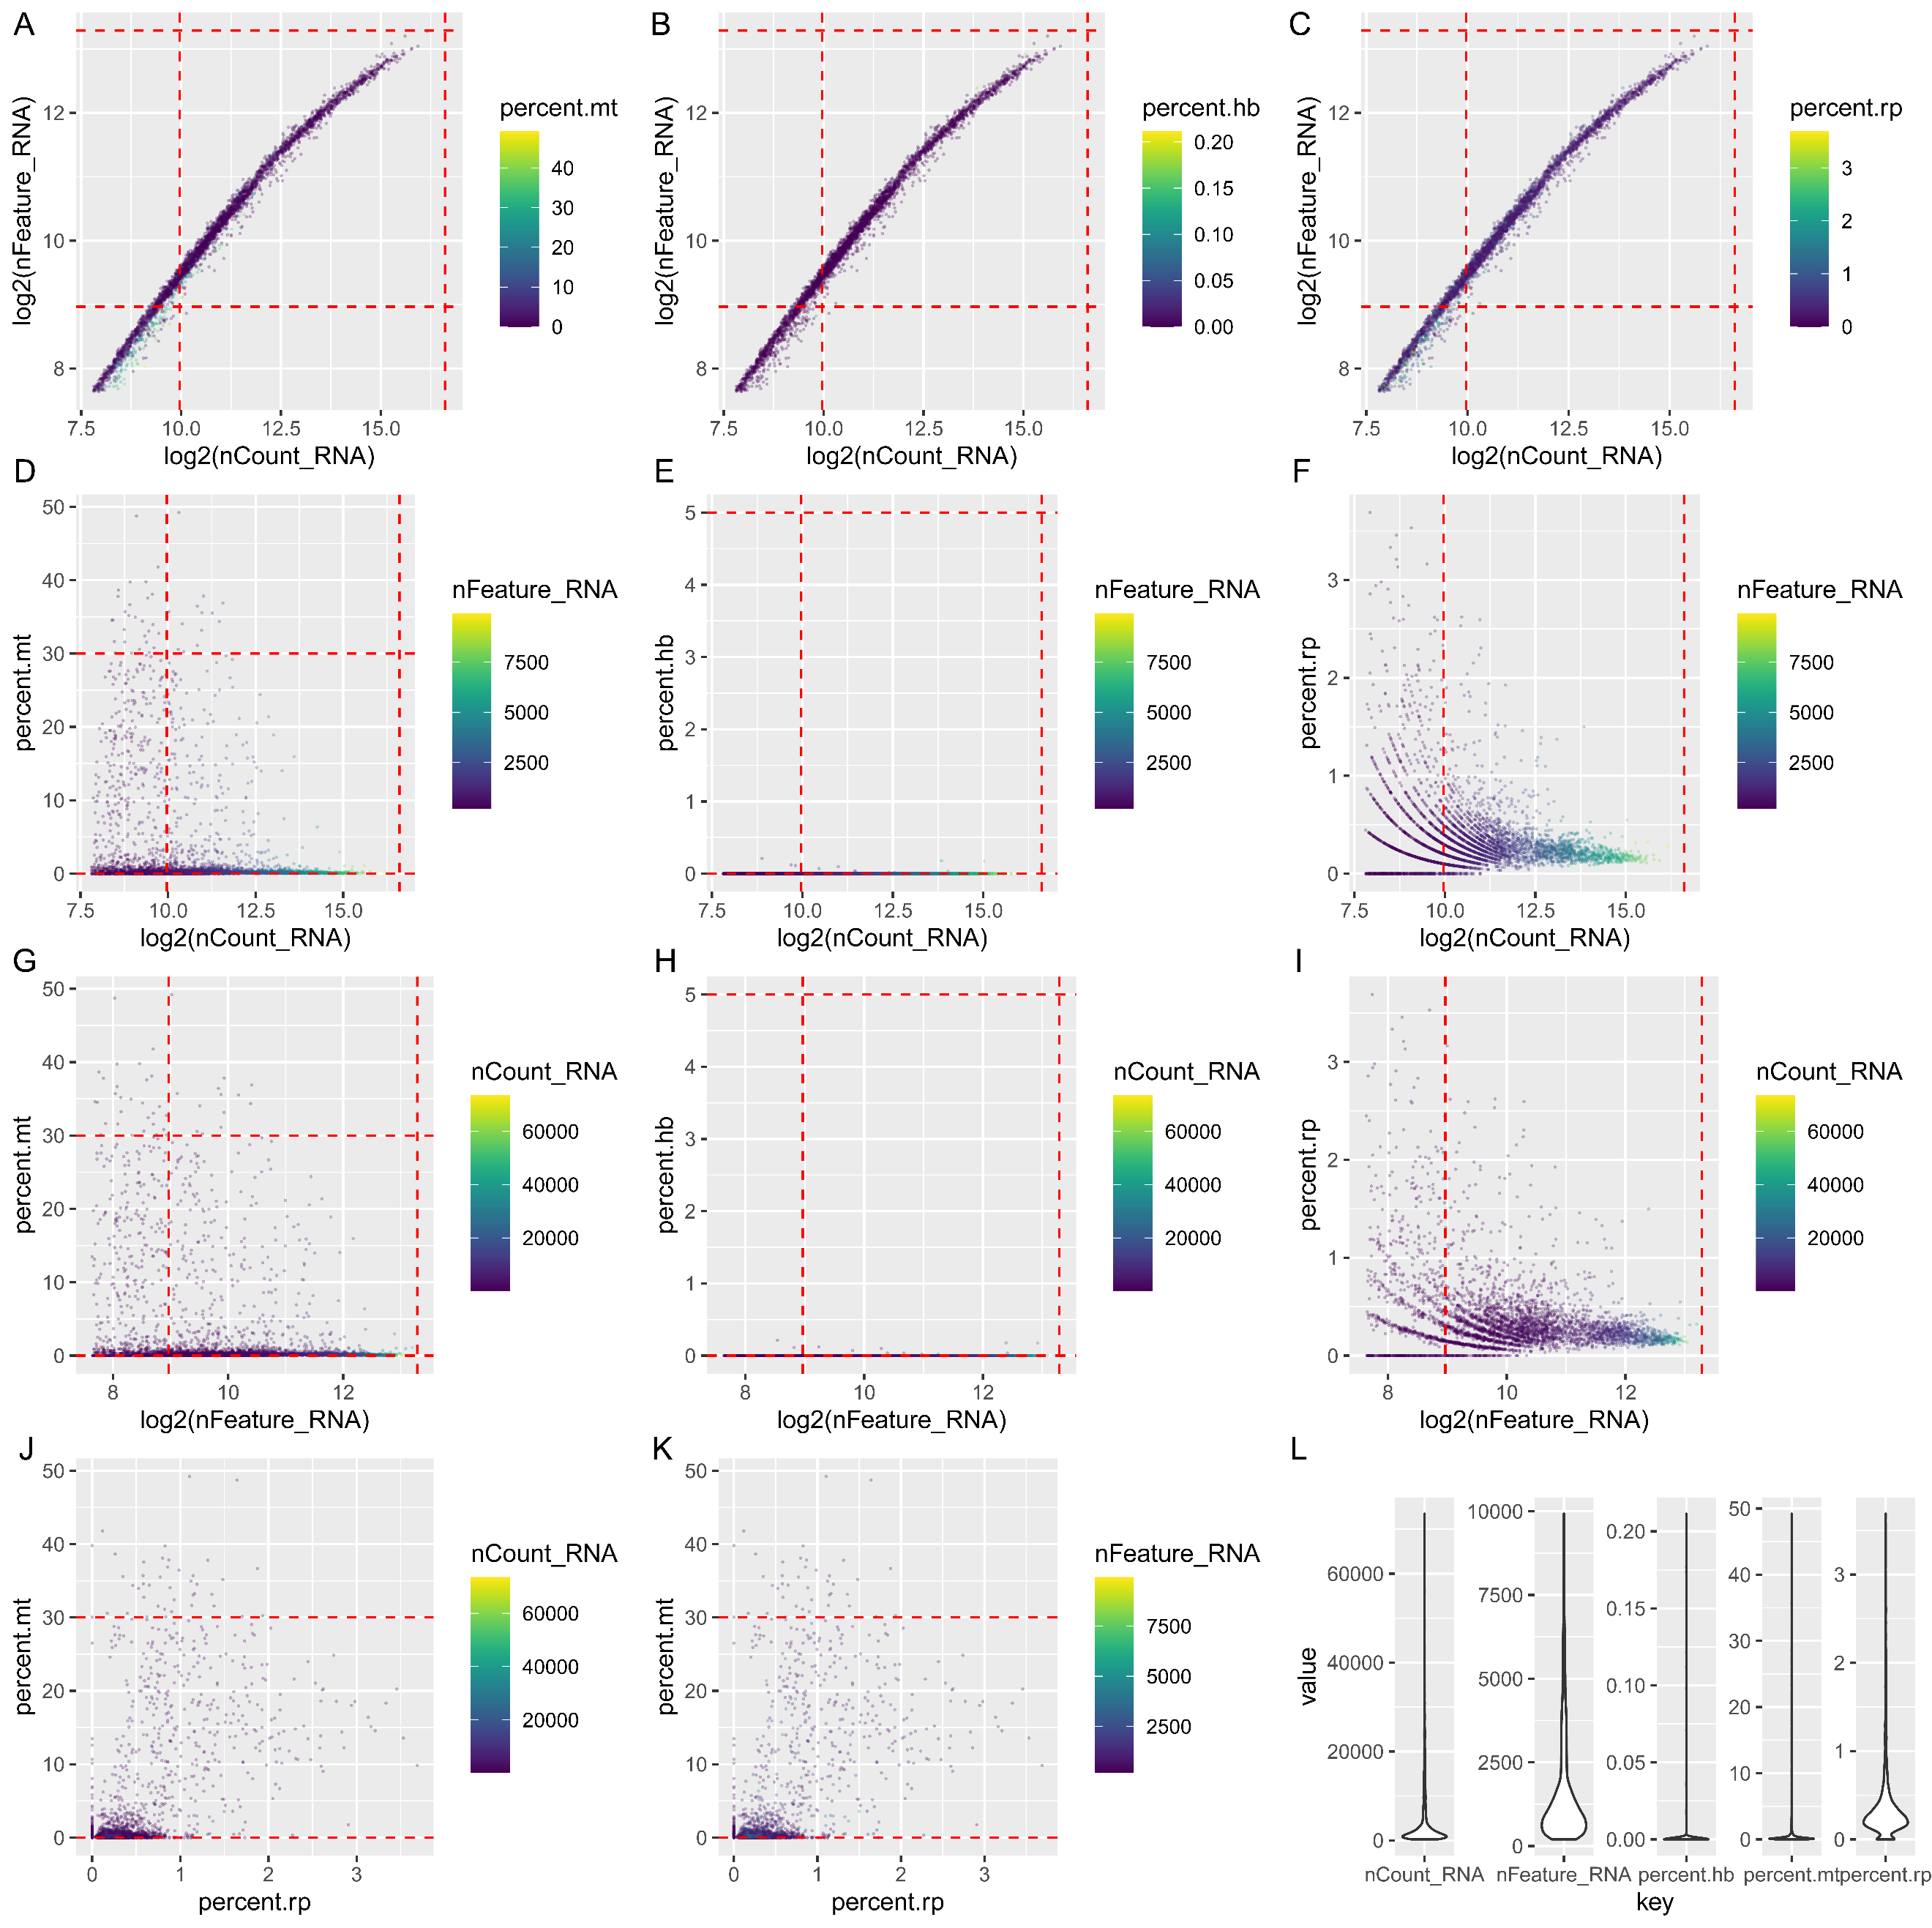


**Supplementary Figure 2**


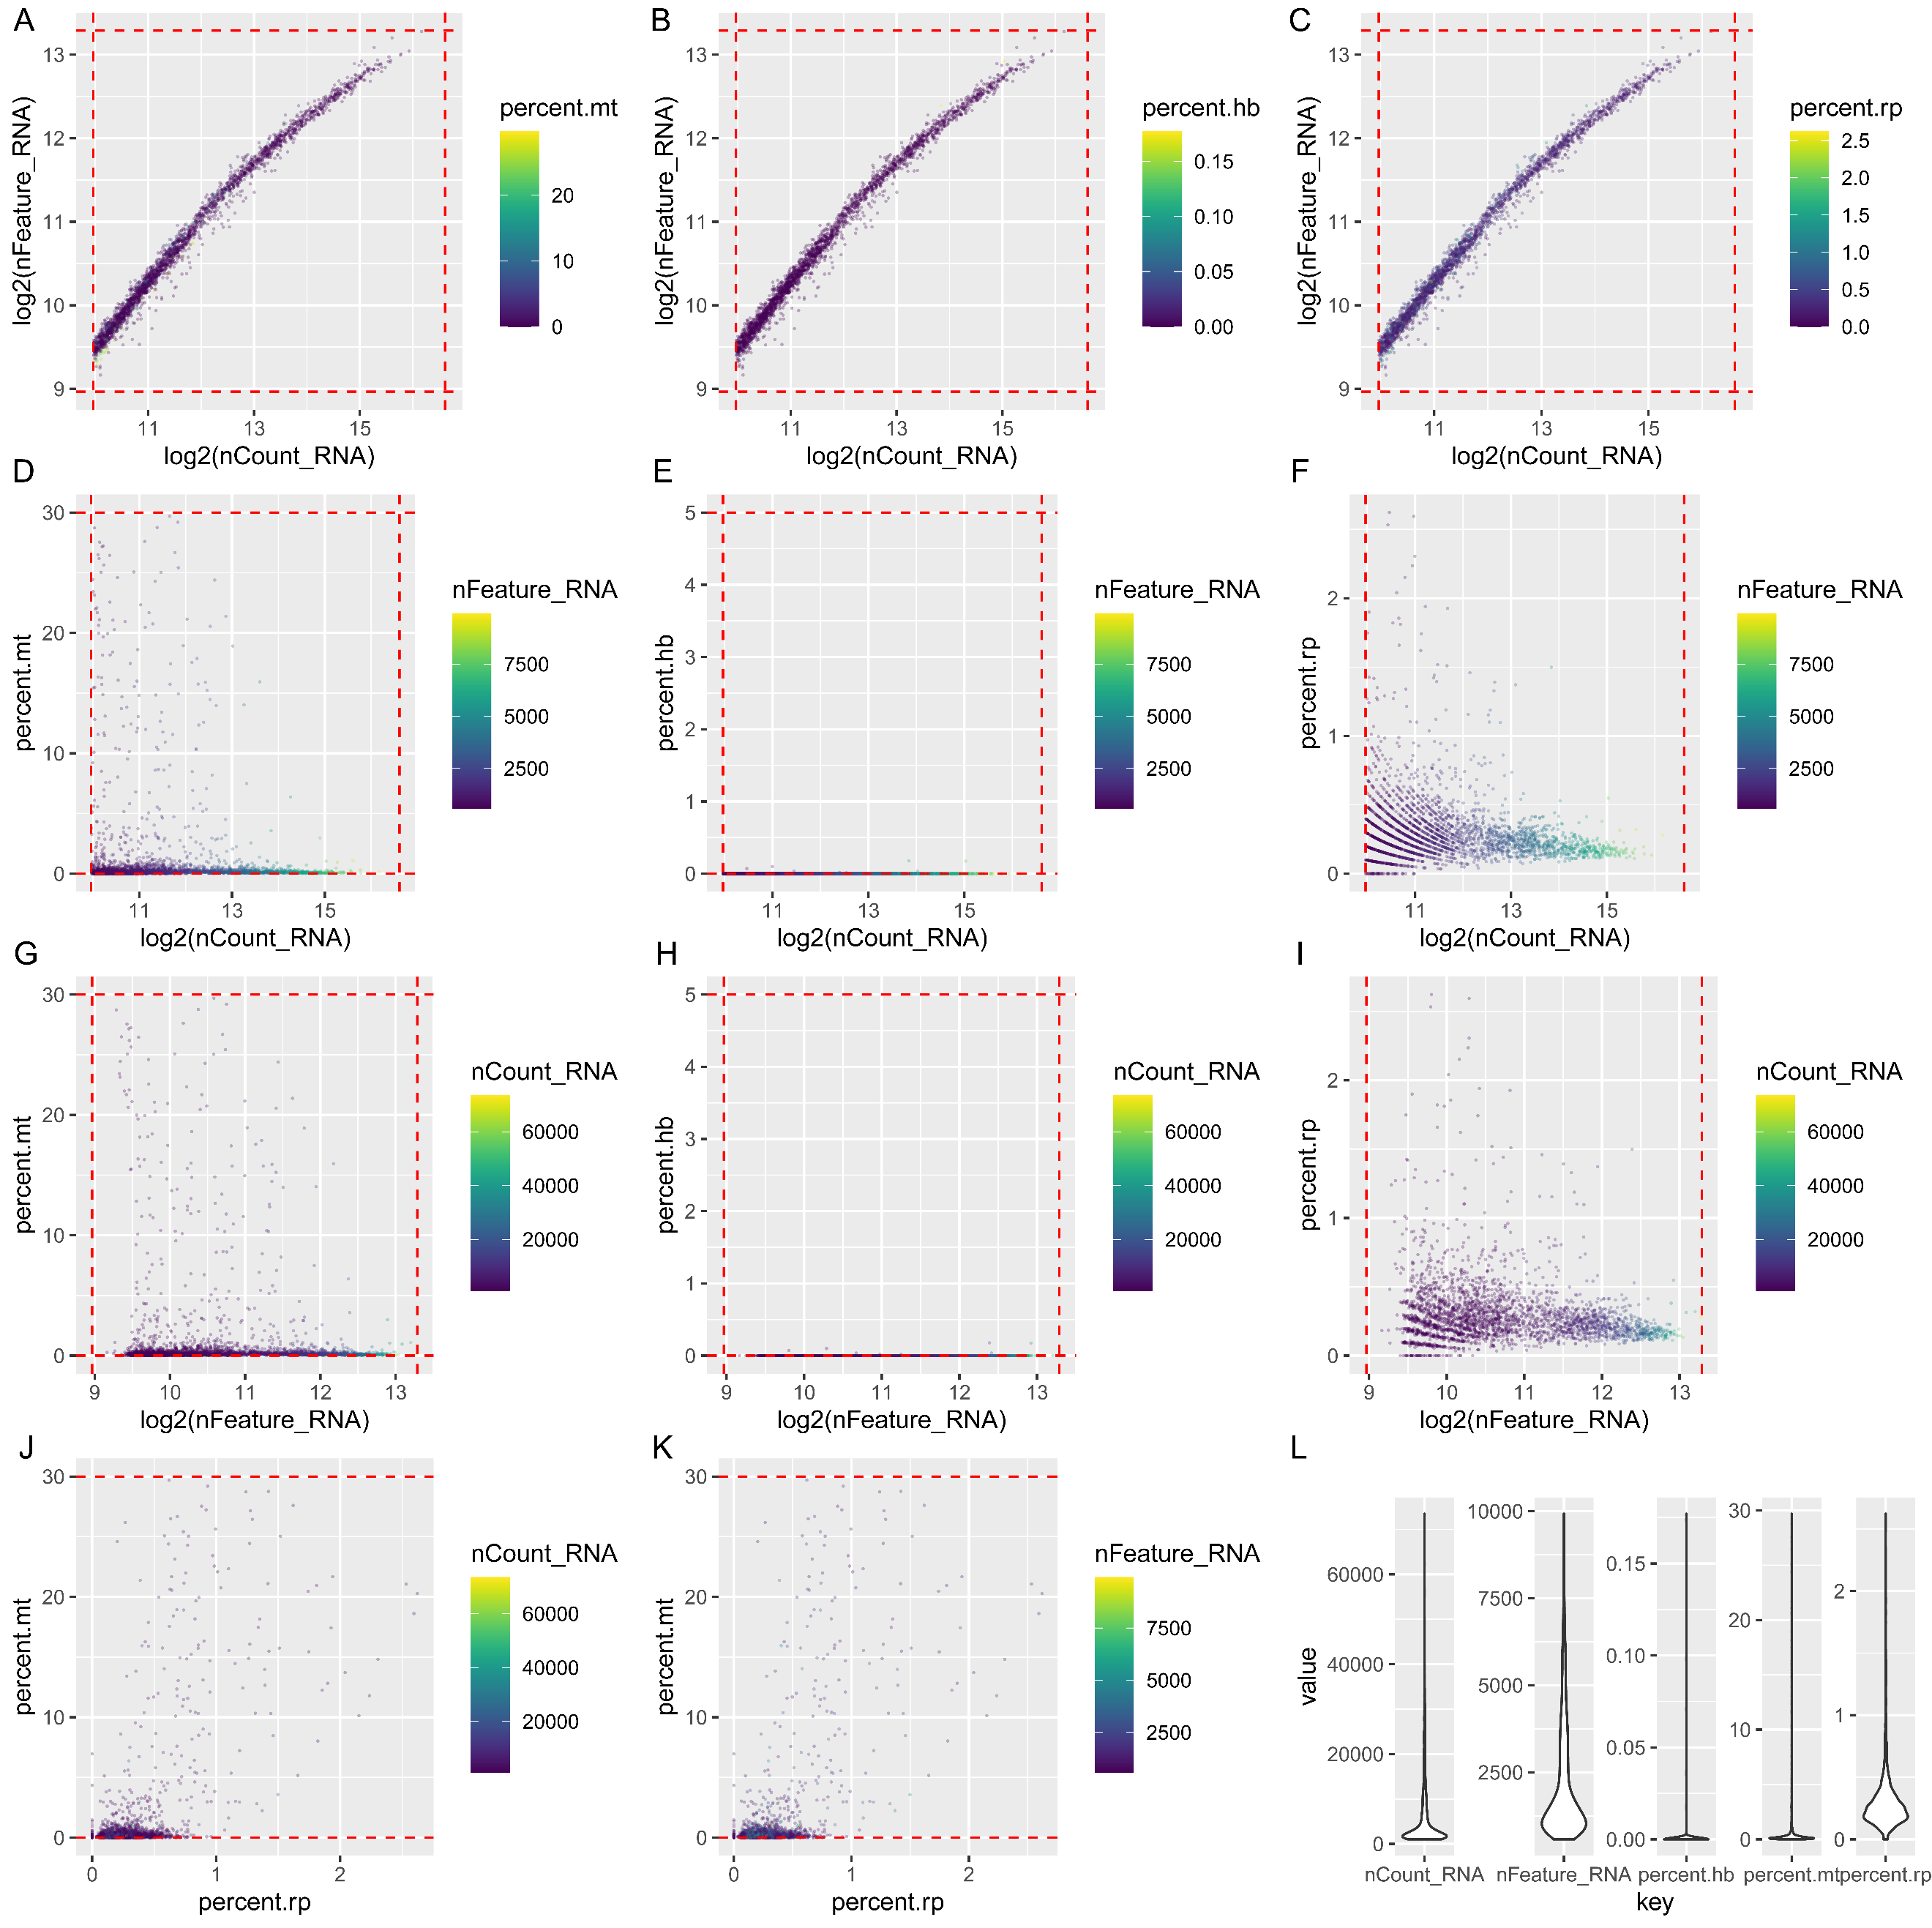


**Supplementary Figure 3**


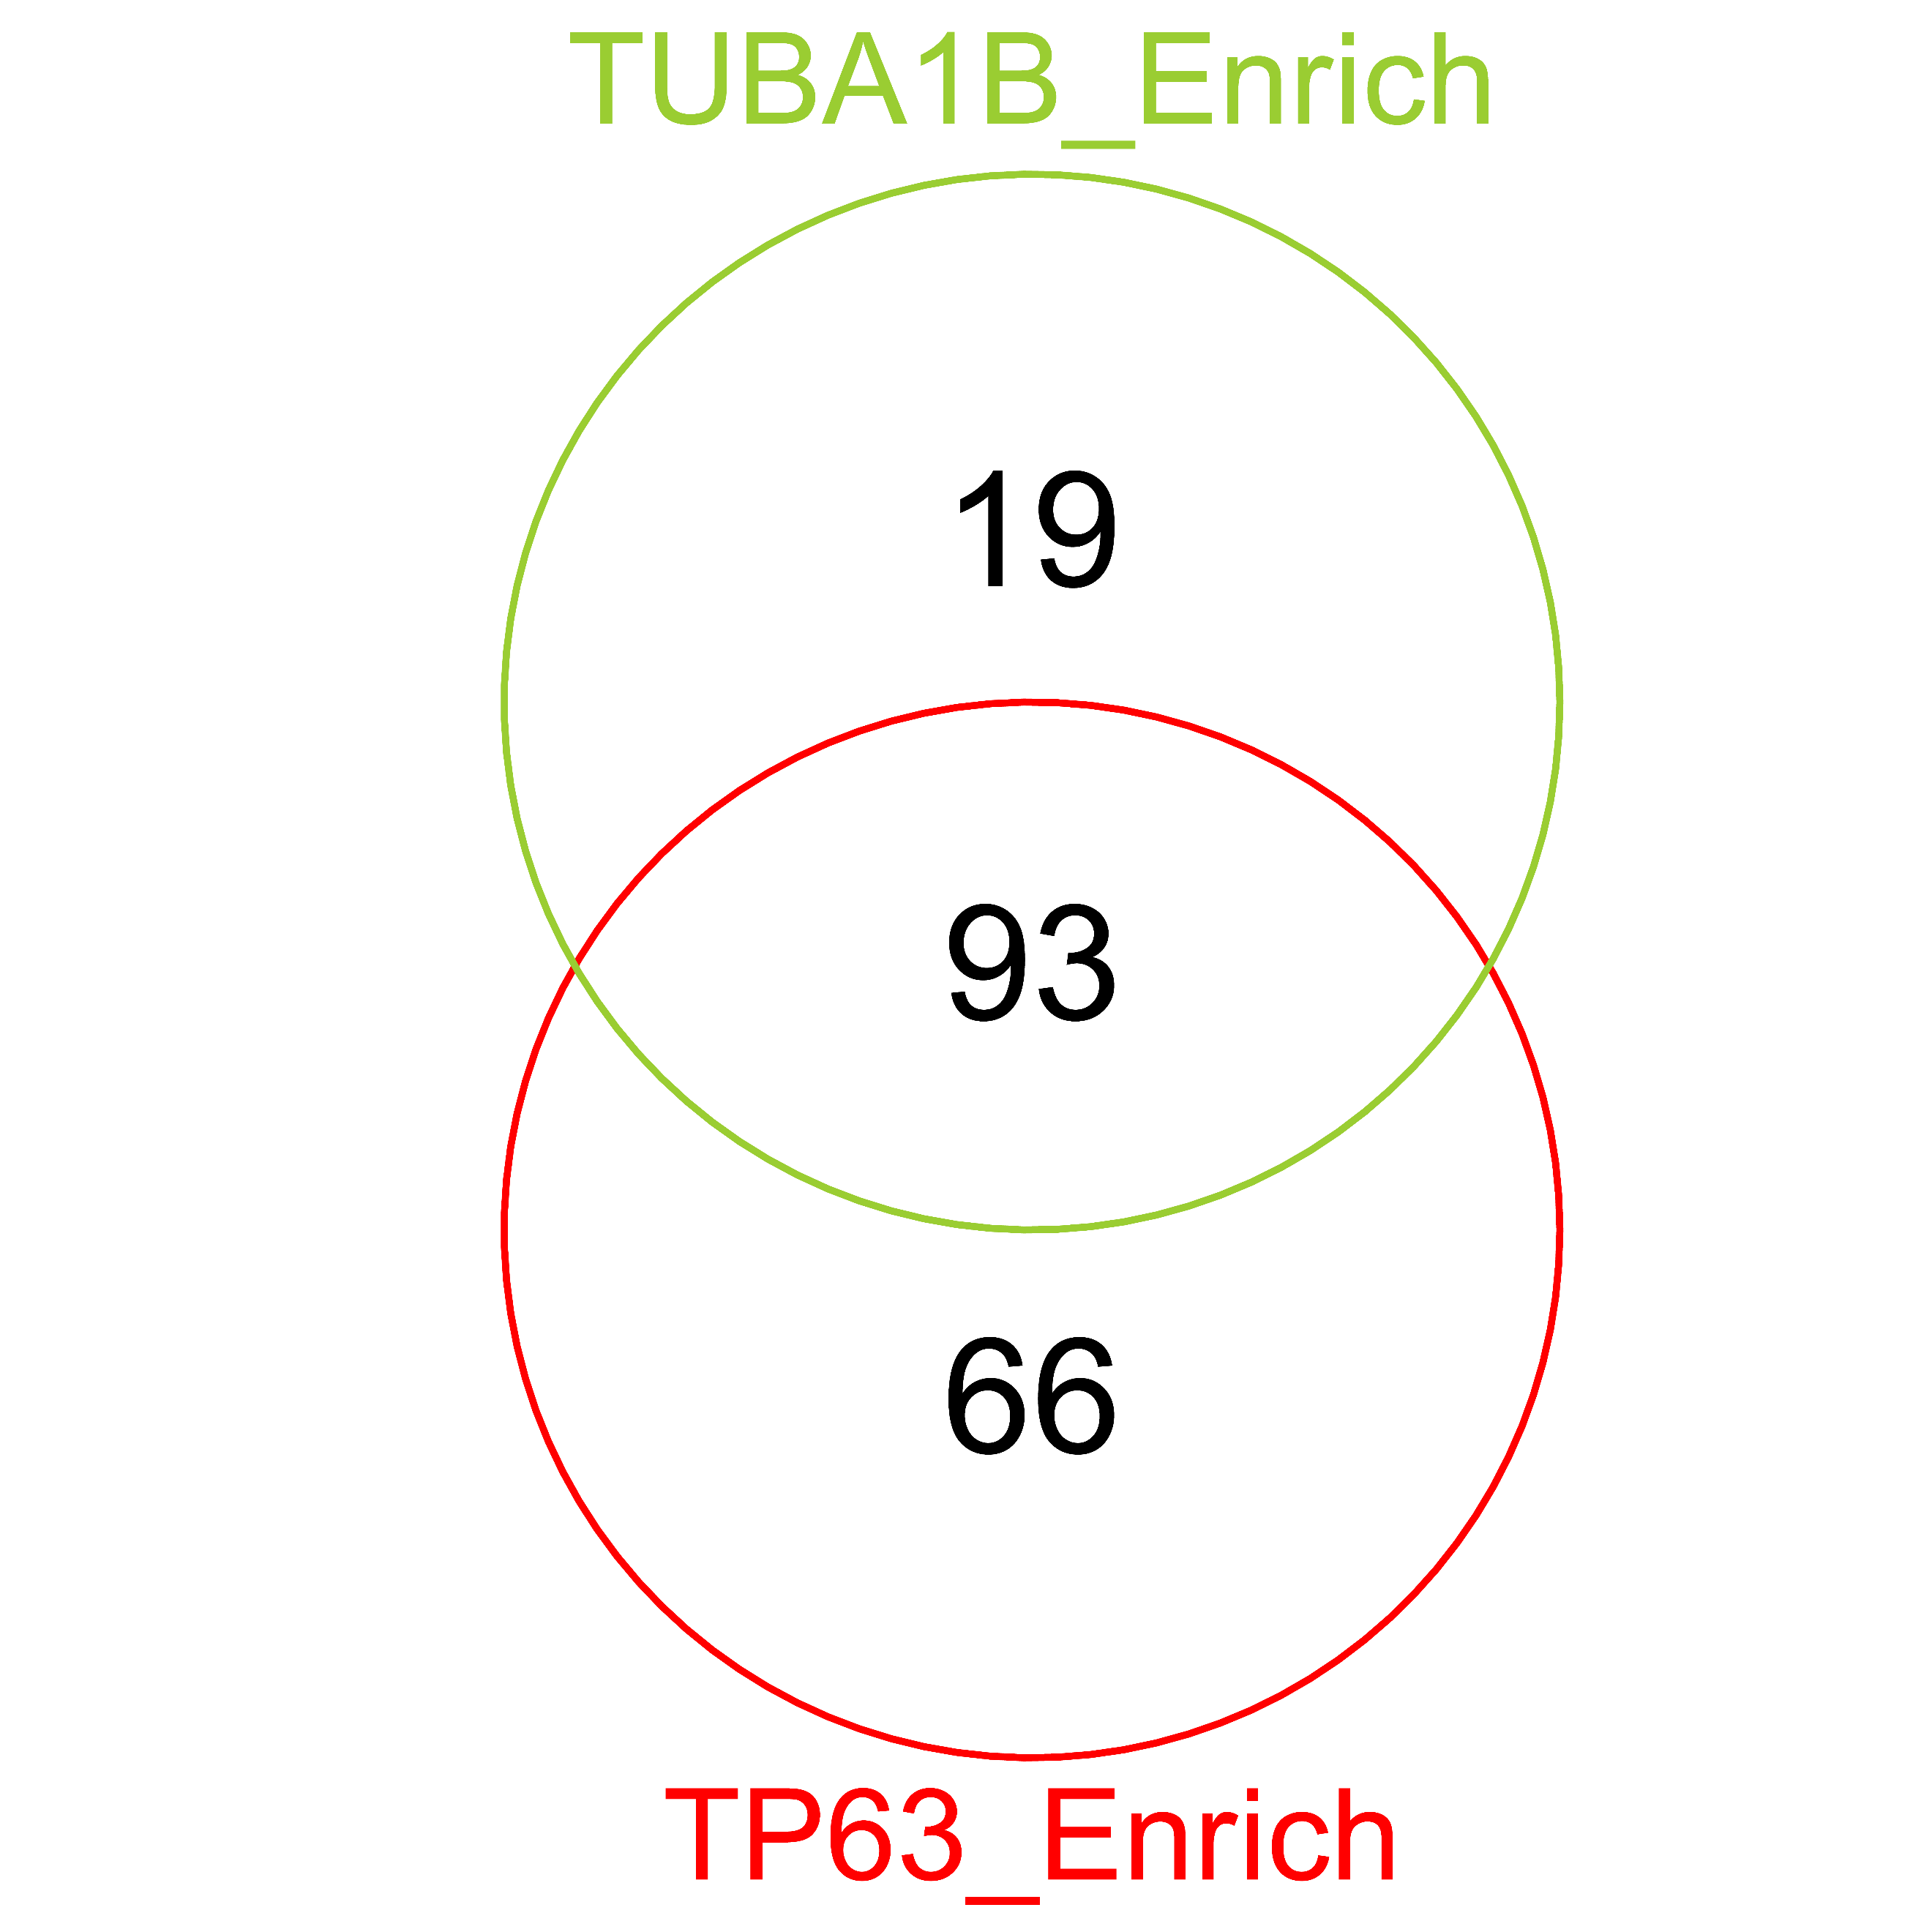


**Supplementary Figure 4**


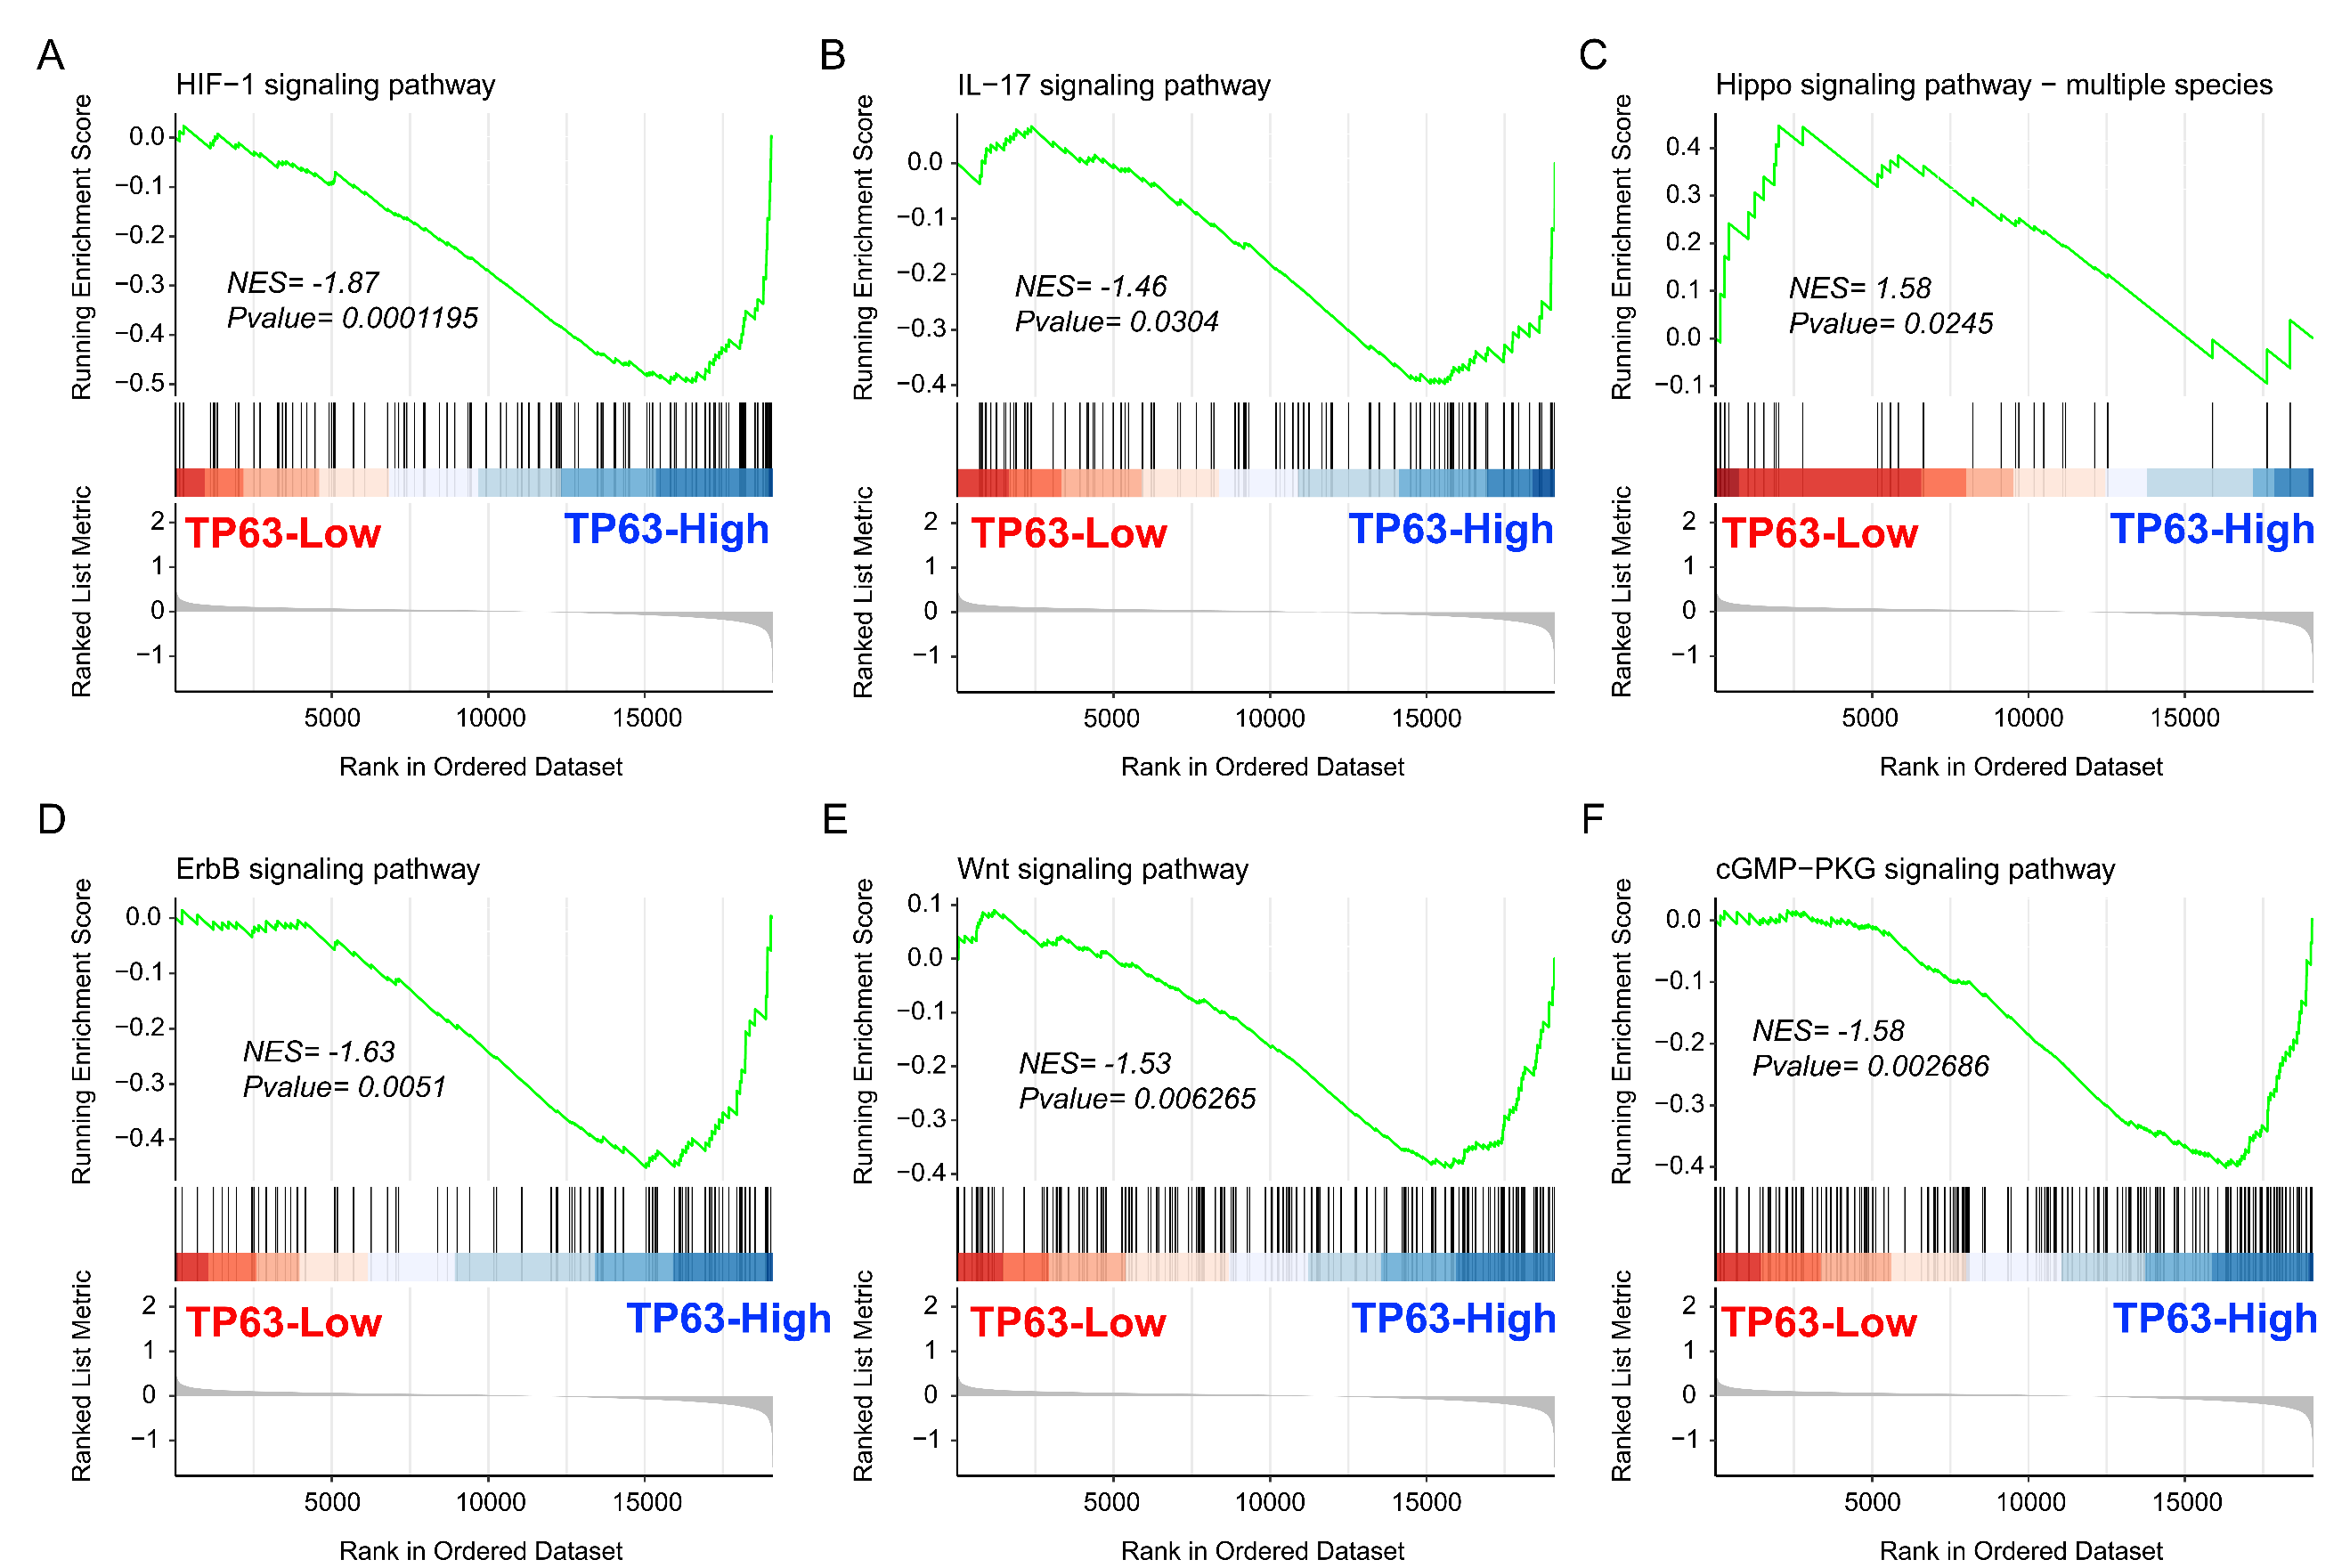


**
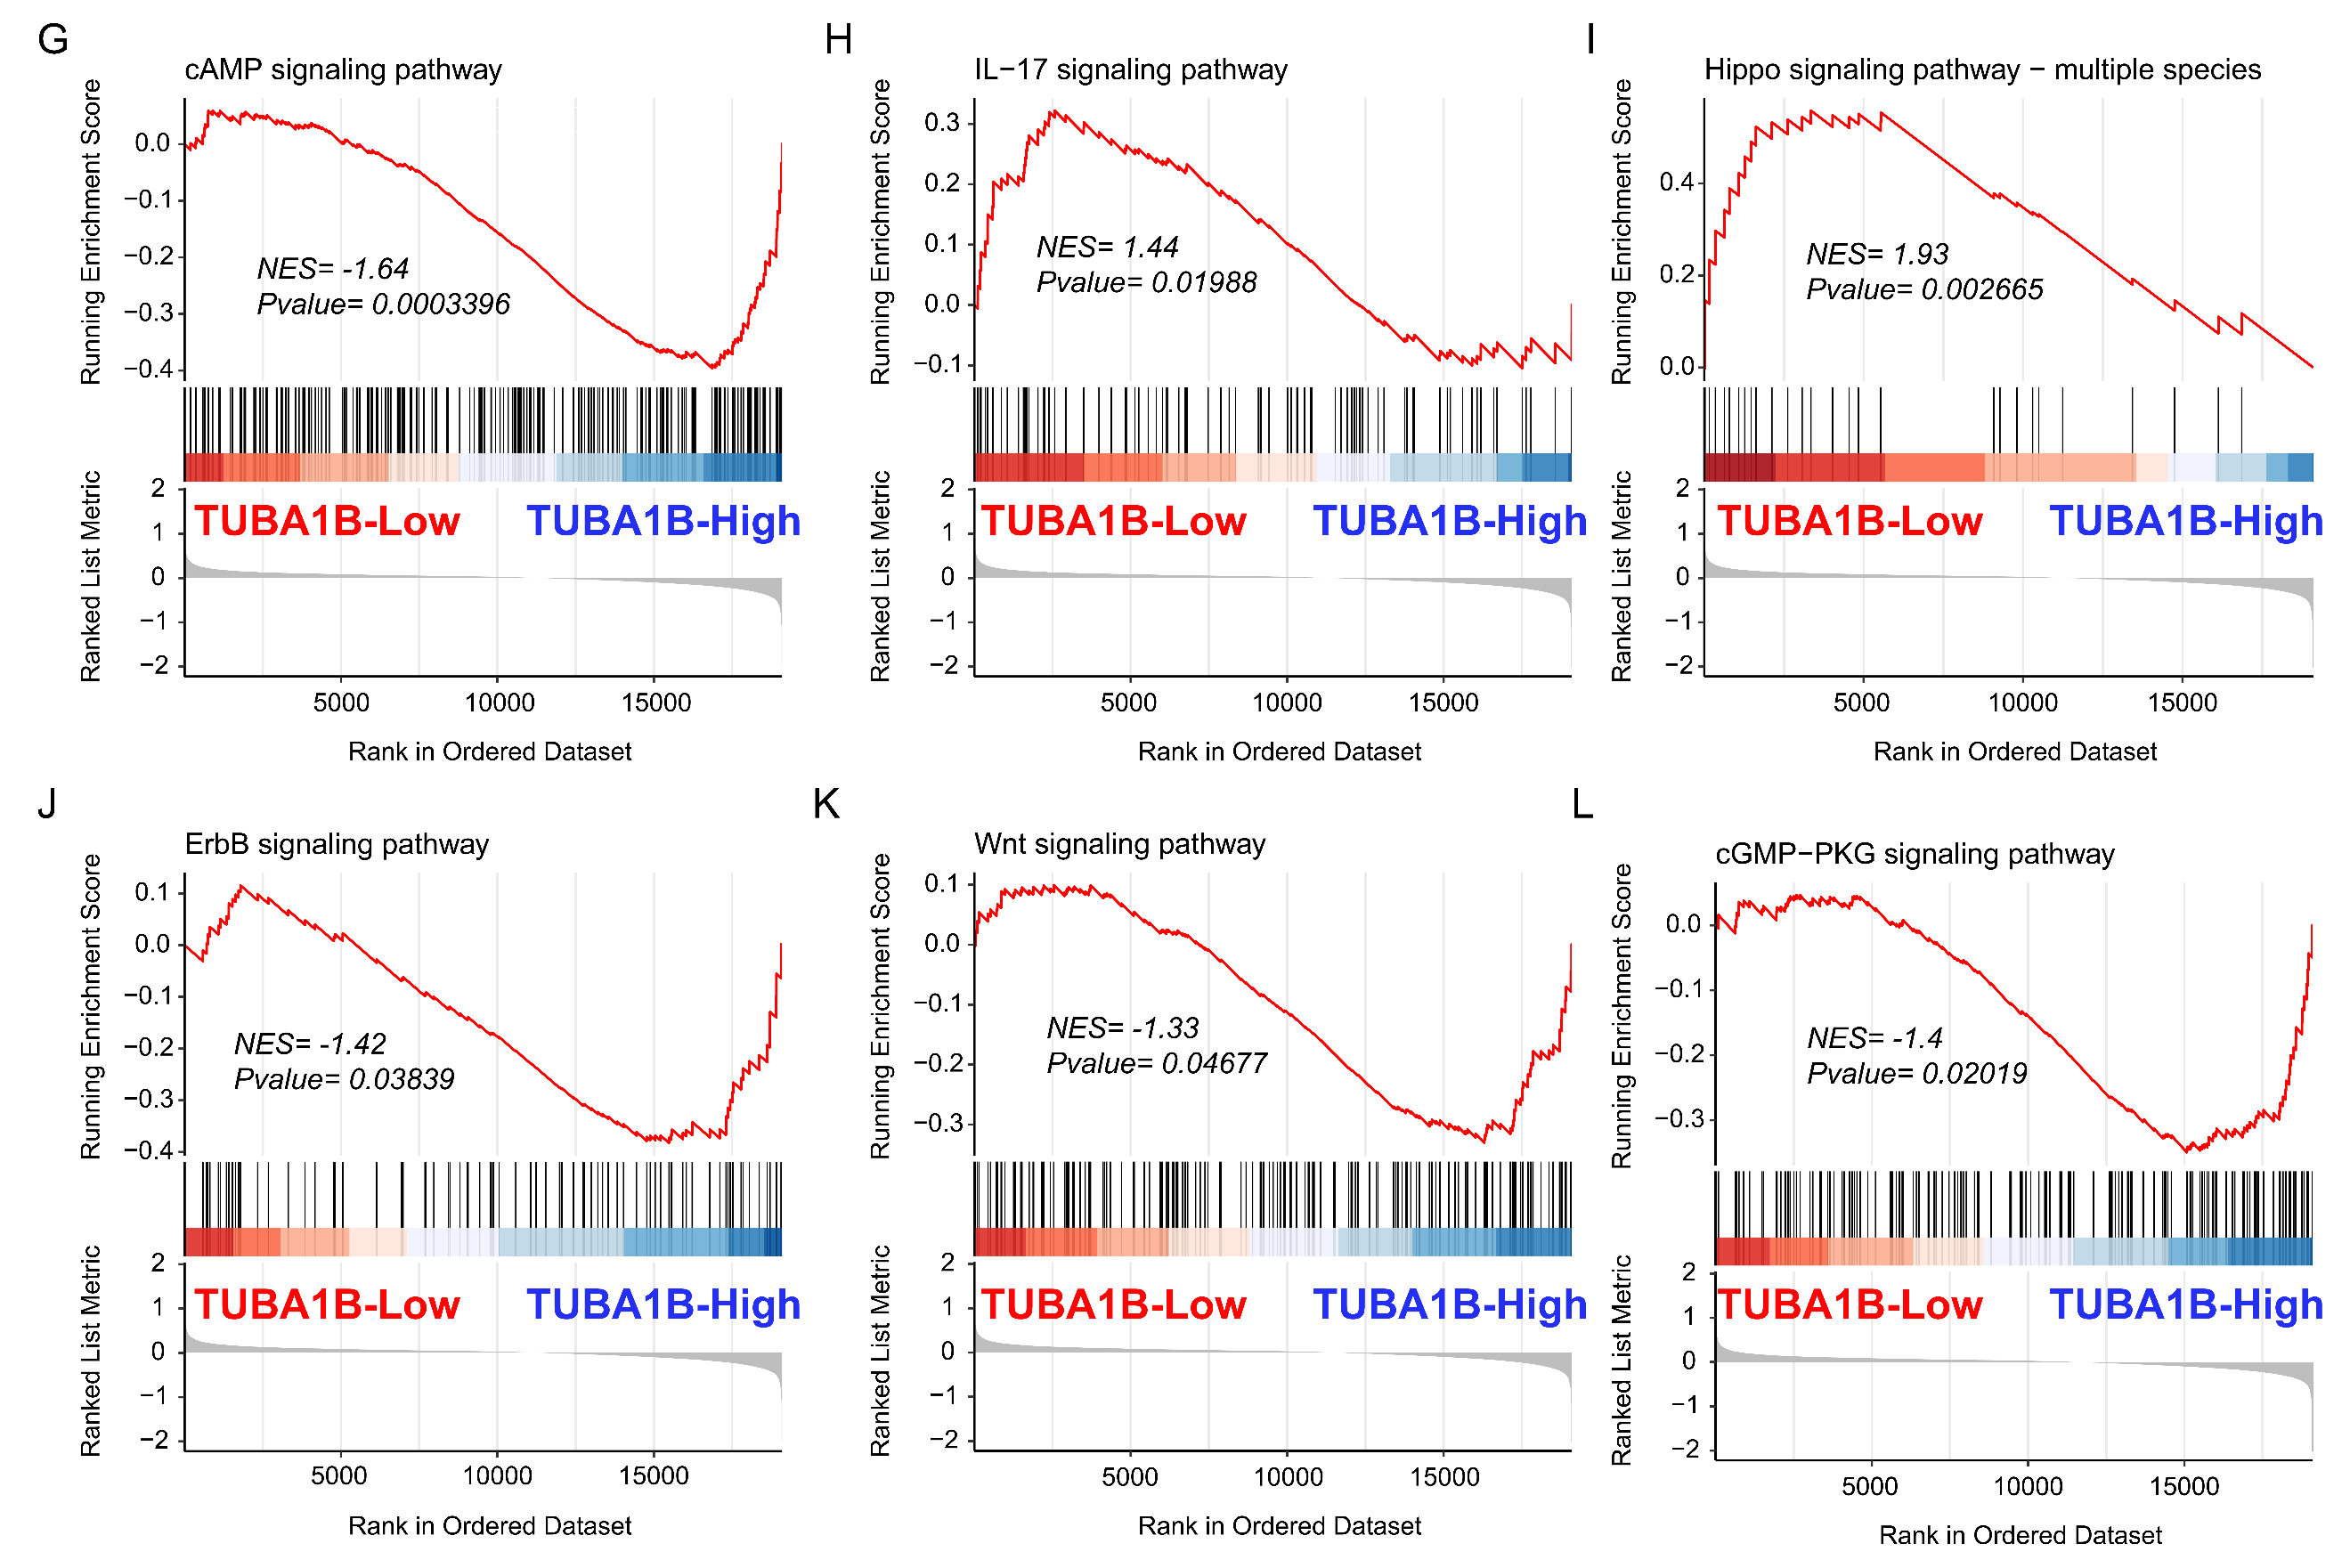
**

**Supplementary Figure 5**


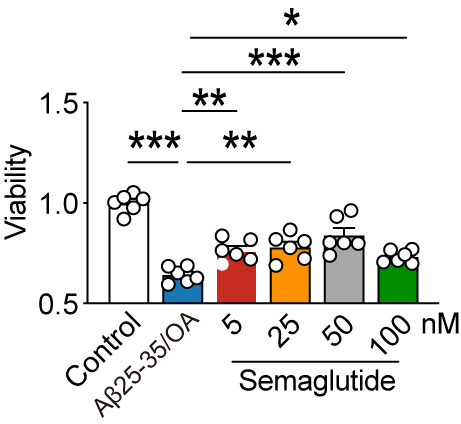


**Supplementary Figure 6**
