# Supplementary material for: HIF-1α exerts a double-edged sword regulatory role in hippocampal neuronal PANoptosis of Alzheimer's disease through HK2/VDAC1/NLRP3 axis and RIPK3 signal
Source: Research Square preprint supplement (doi:10.21203/rs.3.rs-7239681/v1), 2025-07-31
Supplement: Supplementary file 2 [file 48c0013bdf6bdd9ebb8b97ad.xlsx]

## Sheet: overlap
93 common elements in "TP63_sgGSEA" and "TUBA1B_sgGSEA":
Pathways of neurodegeneration - multiple diseases
Alzheimer disease
Neuroactive ligand-receptor interaction
Amyotrophic lateral sclerosis
Huntington disease
Prion disease
Calcium signaling pathway
Diabetic cardiomyopathy
Tuberculosis
Oxytocin signaling pathway
Phagosome
Spinocerebellar ataxia
Retrograde endocannabinoid signaling
Yersinia infection
Osteoclast differentiation
Oxidative phosphorylation
Glutamatergic synapse
HIF-1 signaling pathway
Circadian entrainment
Morphine addiction
Rheumatoid arthritis
Synaptic vesicle cycle
Staphylococcus aureus infection
Gastric acid secretion
Leishmaniasis
Pertussis
Epithelial cell signaling in Helicobacter pylori infection
Amphetamine addiction
Long-term potentiation
Inflammatory bowel disease
Viral myocarditis
Endocrine and other factor-regulated calcium reabsorption
Systemic lupus erythematosus
Type I diabetes mellitus
Graft-versus-host disease
Nicotine addiction
Asthma
Parkinson disease
cAMP signaling pathway
Chemical carcinogenesis - reactive oxygen species
Adrenergic signaling in cardiomyocytes
Dopaminergic synapse
Phosphatidylinositol signaling system
Inflammatory mediator regulation of TRP channels
GABAergic synapse
Cardiac muscle contraction
GnRH secretion
Long-term depression
Intestinal immune network for IgA production
Serotonergic synapse
Neutrophil extracellular trap formation
Lysosome
Cholinergic synapse
Aldosterone synthesis and secretion
Vibrio cholerae infection
African trypanosomiasis
Allograft rejection
Insulin secretion
Fc gamma R-mediated phagocytosis
Central carbon metabolism in cancer
Melanogenesis
Autoimmune thyroid disease
Carbohydrate digestion and absorption
Fructose and mannose metabolism
Gap junction
Non-alcoholic fatty liver disease
Citrate cycle (TCA cycle)
Carbon metabolism
cGMP-PKG signaling pathway
Salivary secretion
Collecting duct acid secretion
Amino sugar and nucleotide sugar metabolism
Axon guidance
Taste transduction
Fc epsilon RI signaling pathway
Glioma
Wnt signaling pathway
Aldosterone-regulated sodium reabsorption
ErbB signaling pathway
Glycolysis / Gluconeogenesis
Proteasome
Oocyte meiosis
Biosynthesis of cofactors
Pancreatic secretion
Biosynthesis of nucleotide sugars
Cocaine addiction
Vitamin digestion and absorption
Inositol phosphate metabolism
ABC transporters
Nucleotide excision repair
Hippo signaling pathway - multiple species
IL-17 signaling pathway
Biosynthesis of amino acids
