# Supplementary material for: HIF-1α exerts a double-edged sword regulatory role in hippocampal neuronal PANoptosis of Alzheimer's disease through HK2/VDAC1/NLRP3 axis and RIPK3 signal
Source: Research Square preprint supplement (doi:10.21203/rs.3.rs-7239681/v1), 2025-07-31
Supplement: Supplementary file 3 [file ad7da3a09d4e77d8f2b2b741.xlsx]

## Sheet: Sheet1
APOPTOSIS	Gene Symbol	Description	Relevance score	FERROPTOSIS	Gene Symbol	Description	Relevance score	NECROPTOSIS	Gene Symbol	Description	Relevance score	PYROPTOSIS	Gene Symbol	Description	Relevance score
	CASP8	Caspase 8	50.7759		AIFM2	Apoptosis Inducing Factor Mitochondria Associated 2	12.7566		RIPK1	Receptor Interacting Serine/Threonine Kinase 1	19.936		GSDMD	Gasdermin D	16.6855
	BCL2	BCL2 Apoptosis Regulator	48.9249		GPX4	Glutathione Peroxidase 4	11.5524		RIPK3	Receptor Interacting Serine/Threonine Kinase 3	17.0603		GSDME	Gasdermin E	14.5353
	CASP3	Caspase 3	45.0032		SLC7A11	Solute Carrier Family 7 Member 11	6.54781		MLKL	Mixed Lineage Kinase Domain Like Pseudokinase	16.5374		NLRP3	NLR Family Pyrin Domain Containing 3	12.8231
	FAS	Fas Cell Surface Death Receptor	43.4203		TP53	Tumor Protein P53	5.42653		ZBP1	Z-DNA Binding Protein 1	10.5533		CASP1	Caspase 1	10.6312
	BAX	BCL2 Associated X, Apoptosis Regulator	42.3461		NFE2L2	NFE2 Like BZIP Transcription Factor 2	5.22664		CASP8	Caspase 8	7.42801		CASP4	Caspase 4	9.82789
	XIAP	X-Linked Inhibitor Of Apoptosis	41.5673		ACSL4	Acyl-CoA Synthetase Long Chain Family Member 4	4.44644		TNF	Tumor Necrosis Factor	4.90793		GSDMC	Gasdermin C	8.36841
	CFLAR	CASP8 And FADD Like Apoptosis Regulator	35.8484		TFRC	Transferrin Receptor	3.88212		CYLD	CYLD Lysine 63 Deubiquitinase	4.02588		GSDMB	Gasdermin B	8.36168
	FASLG	Fas Ligand	35.3611		NCOA4	Nuclear Receptor Coactivator 4	3.57646		ITPK1	Inositol-Tetrakisphosphate 1-Kinase	3.59339		NLRP1	NLR Family Pyrin Domain Containing 1	6.91709
	CASP10	Caspase 10	34.903		HMOX1	Heme Oxygenase 1	3.36487		IPMK	Inositol Polyphosphate Multikinase	3.59339		IL1B	Interleukin 1 Beta	6.09608
	TP53	Tumor Protein P53	33.4693		SLC40A1	Solute Carrier Family 40 Member 1	3.27099		MAP3K7	Mitogen-Activated Protein Kinase Kinase Kinase 7	3.14906		GZMB	Granzyme B	5.90466
	AIFM1	Apoptosis Inducing Factor Mitochondria Associated 1	33.2089		SLC3A2	Solute Carrier Family 3 Member 2	3.24577		CASP6	Caspase 6	3.06583		GSDMA	Gasdermin A	5.69733
	CASP9	Caspase 9	32.9371		ALOX15	Arachidonate 15-Lipoxygenase	3.10786		TRPM7	Transient Receptor Potential Cation Channel Subfamily M Member 7	3.01622		AIM2	Absent In Melanoma 2	5.28168
	TNFSF10	TNF Superfamily Member 10	31.9873		IREB2	Iron Responsive Element Binding Protein 2	3.0119						CARD8	Caspase Recruitment Domain Family Member 8	5.23703
	MCL1	MCL1 Apoptosis Regulator, BCL2 Family Member	30.4055										CASP8	Caspase 8	5.18865
	BCL2L1	BCL2 Like 1	28.7126										GZMA	Granzyme A	4.96293
	CYCS	Cytochrome C, Somatic	25.9848										PYCARD	PYD And CARD Domain Containing	4.94882
	BIRC5	Baculoviral IAP Repeat Containing 5	25.7671										DPP9	Dipeptidyl Peptidase 9	4.82343
	BCL2L11	BCL2 Like 11	24.6871										CASP5	Caspase 5	4.76884
	CASP7	Caspase 7	23.8345										IL18	Interleukin 18	4.63189
	TNFRSF10B	TNF Receptor Superfamily Member 10b	23.5354										ZBP1	Z-DNA Binding Protein 1	4.51144
	PRKCD	Protein Kinase C Delta	23.1157										CASP3	Caspase 3	4.45886
	CASP2	Caspase 2	22.2014										NLRC4	NLR Family CARD Domain Containing 4	4.16681
	NAIP	NLR Family Apoptosis Inhibitory Protein	22.1674										DPP8	Dipeptidyl Peptidase 8	4.03683
	TNF	Tumor Necrosis Factor	22.0031										MIR223	MicroRNA 223	3.48716
	BOK	BCL2 Family Apoptosis Regulator BOK	21.6849										CASP6	Caspase 6	3.47739
	CASP6	Caspase 6	21.5119										TRIM24	Tripartite Motif Containing 24	3.18276
	CASP1	Caspase 1	21.1058										NAIP	NLR Family Apoptosis Inhibitory Protein	3.16607
	MAPK8	Mitogen-Activated Protein Kinase 8	20.8877										HMGB1	High Mobility Group Box 1	3.14822
	PAWR	Pro-Apoptotic WT1 Regulator	20.0215										MEFV	MEFV Innate Immuity Regulator, Pyrin	3.09951
	AKT1	AKT Serine/Threonine Kinase 1	19.8962
	BIRC2	Baculoviral IAP Repeat Containing 2	19.5847
	TNFRSF10A	TNF Receptor Superfamily Member 10a	19.3403
	PARP1	Poly(ADP-Ribose) Polymerase 1	19.1932
	BIRC3	Baculoviral IAP Repeat Containing 3	19.0761
	SIVA1	SIVA1 Apoptosis Inducing Factor	19.0065
	BID	BH3 Interacting Domain Death Agonist	18.8057
	AIFM3	Apoptosis Inducing Factor Mitochondria Associated 3	18.7478
	DIABLO	Diablo IAP-Binding Mitochondrial Protein	18.2225
	KRAS	KRAS Proto-Oncogene, GTPase	17.5452
	AIFM2	Apoptosis Inducing Factor Mitochondria Associated 2	17.3419
	MOAP1	Modulator Of Apoptosis 1	17.2996
	API5	Apoptosis Inhibitor 5	17.2075
	MAPK1	Mitogen-Activated Protein Kinase 1	17.0821
	BAK1	BCL2 Antagonist/Killer 1	16.9252
	CDKN1A	Cyclin Dependent Kinase Inhibitor 1A	16.8186
	BIRC7	Baculoviral IAP Repeat Containing 7	16.7335
	AATK	Apoptosis Associated Tyrosine Kinase	16.7265
	FADD	Fas Associated Via Death Domain	16.7023
	NRAS	NRAS Proto-Oncogene, GTPase	16.5076
	MAP3K5	Mitogen-Activated Protein Kinase Kinase Kinase 5	16.3972
	CCAR2	Cell Cycle And Apoptosis Regulator 2	16.2635
	CCAR1	Cell Division Cycle And Apoptosis Regulator 1	16.0484
	STAT3	Signal Transducer And Activator Of Transcription 3	15.7873
	PEA15	Proliferation And Apoptosis Adaptor Protein 15	15.6199
	MAPK14	Mitogen-Activated Protein Kinase 14	15.3166
	RIPK1	Receptor Interacting Serine/Threonine Kinase 1	15.25
	AVEN	Apoptosis And Caspase Activation Inhibitor	15.2375
	AEN	Apoptosis Enhancing Nuclease	15.137
	CASP4	Caspase 4	15.0178
	BFAR	Bifunctional Apoptosis Regulator	14.9914
	TP53AIP1	Tumor Protein P53 Regulated Apoptosis Inducing Protein 1	14.9891
	AATF	Apoptosis Antagonizing Transcription Factor	14.8975
	TNFRSF1A	TNF Receptor Superfamily Member 1A	14.8957
	BBC3	BCL2 Binding Component 3	14.863
	MYC	MYC Proto-Oncogene, BHLH Transcription Factor	14.8424
	CIAPIN1	Cytokine Induced Apoptosis Inhibitor 1	14.7185
	NAIF1	Nuclear Apoptosis Inducing Factor 1	14.6121
	APAF1	Apoptotic Peptidase Activating Factor 1	14.564
	PERP	P53 Apoptosis Effector Related To PMP22	14.5543
	BAD	BCL2 Associated Agonist Of Cell Death	14.4461
	ANXA5	Annexin A5	14.4437
	TRIAP1	TP53 Regulated Inhibitor Of Apoptosis 1	14.3612
	AREL1	Apoptosis Resistant E3 Ubiquitin Protein Ligase 1	14.1769
	ECSCR	Endothelial Cell Surface Expressed Chemotaxis And Apoptosis Regulator	12.8067
	TNFRSF10C	TNF Receptor Superfamily Member 10c	12.7921
	MDM2	MDM2 Proto-Oncogene	12.7326
	TNFRSF10D	TNF Receptor Superfamily Member 10d	12.6983
	CAAP1	Caspase Activity And Apoptosis Inhibitor 1	12.6839
	CASP14	Caspase 14	12.5978
	NFKB1	Nuclear Factor Kappa B Subunit 1	12.4526
	JUN	Jun Proto-Oncogene, AP-1 Transcription Factor Subunit	12.4349
	TP53BP2	Tumor Protein P53 Binding Protein 2	12.3655
	TRAF2	TNF Receptor Associated Factor 2	12.3016
	CASP5	Caspase 5	12.127
	MTOR	Mechanistic Target Of Rapamycin Kinase	12.1088
	BCL2L2	BCL2 Like 2	12.1005
	E2F1	E2F Transcription Factor 1	11.9648
	ELAPOR1	Endosome-Lysosome Associated Apoptosis And Autophagy Regulator 1	11.9156
	BIK	BCL2 Interacting Killer	11.8413
	GZMB	Granzyme B	11.7841
	DDIAS	DNA Damage Induced Apoptosis Suppressor	11.7841
	PTEN	Phosphatase And Tensin Homolog	11.5054
	BLCAP	BLCAP Apoptosis Inducing Factor	11.2905
	NIBAN2	Niban Apoptosis Regulator 2	11.1081
	BCL2L14	BCL2 Like 14	10.7576
	PYCARD	PYD And CARD Domain Containing	10.7047
	NIBAN1	Niban Apoptosis Regulator 1	10.6079
	CDK1	Cyclin Dependent Kinase 1	10.5929
	DFFA	DNA Fragmentation Factor Subunit Alpha	10.5892
	EGFR	Epidermal Growth Factor Receptor	10.5735
	NOL3	Nucleolar Protein 3	10.5082
	BECN1	Beclin 1	10.4282
	PTGS2	Prostaglandin-Endoperoxide Synthase 2	10.2699
	MAPK3	Mitogen-Activated Protein Kinase 3	10.2623
	RAF1	Raf-1 Proto-Oncogene, Serine/Threonine Kinase	10.2493
	TRADD	TNFRSF1A Associated Via Death Domain	10.2193
	ATM	ATM Serine/Threonine Kinase	10.212
	ELAPOR2	Endosome-Lysosome Associated Apoptosis And Autophagy Regulator Family Member 2	10.1655
	BCL2L10	BCL2 Like 10	10.1155
	HSPA5	Heat Shock Protein Family A (Hsp70) Member 5	10.0989
	FOXO3	Forkhead Box O3	10.0679
	DAXX	Death Domain Associated Protein	9.80393
	HTRA2	HtrA Serine Peptidase 2	9.79171
	CDKN2A	Cyclin Dependent Kinase Inhibitor 2A	9.76448
	AATBC	Apoptosis Associated Transcript In Bladder Cancer	9.73469
	CCND1	Cyclin D1	9.71332
	TET2	Tet Methylcytosine Dioxygenase 2	9.69689
	TP73	Tumor Protein P73	9.67108
	MAPK10	Mitogen-Activated Protein Kinase 10	9.62545
	TNFSF12	TNF Superfamily Member 12	9.57589
	TGFB1	Transforming Growth Factor Beta 1	9.51007
	SEPTIN4	Septin 4	9.50276
	TNFRSF25	TNF Receptor Superfamily Member 25	9.43901
	RELA	RELA Proto-Oncogene, NF-KB Subunit	9.41827
	ACTA2	Actin Alpha 2, Smooth Muscle	9.37948
	CLU	Clusterin	9.36901
	BCL2L13	BCL2 Like 13	9.32679
	HIF1A	Hypoxia Inducible Factor 1 Subunit Alpha	9.31211
	MAPK9	Mitogen-Activated Protein Kinase 9	9.27859
	PIK3CG	Phosphatidylinositol-4,5-Bisphosphate 3-Kinase Catalytic Subunit Gamma	9.27527
	VEGFA	Vascular Endothelial Growth Factor A	9.25454
	SIRT1	Sirtuin 1	9.2161
	CSE1L	Chromosome Segregation 1 Like	9.19207
	XAF1	XIAP Associated Factor 1	9.1128
	NIBAN3	Niban Apoptosis Regulator 3	9.06382
	IGF1R	Insulin Like Growth Factor 1 Receptor	9.01724
	CDK2	Cyclin Dependent Kinase 2	8.98914
	IGF1	Insulin Like Growth Factor 1	8.90257
	PMAIP1	Phorbol-12-Myristate-13-Acetate-Induced Protein 1	8.8407
	NFKBIA	NFKB Inhibitor Alpha	8.82156
	VDAC1	Voltage Dependent Anion Channel 1	8.7881
	XIAPP3	X-Linked Inhibitor Of Apoptosis Pseudogene 3	8.77428
	XIAPP2	X-Linked Inhibitor Of Apoptosis Pseudogene 2	8.77428
	IL2	Interleukin 2	8.72342
	HRK	Harakiri, BCL2 Interacting Protein	8.71678
	DFFB	DNA Fragmentation Factor Subunit Beta	8.65484
	PPP1R13B	Protein Phosphatase 1 Regulatory Subunit 13B	8.65421
	PDCD6	Programmed Cell Death 6	8.63908
	RIPK3	Receptor Interacting Serine/Threonine Kinase 3	8.59114
	IFNG	Interferon Gamma	8.4192
	DDIT3	DNA Damage Inducible Transcript 3	8.35597
	RNF7	Ring Finger Protein 7	8.33931
	API5P1	Apoptosis Inhibitor 5 Pseudogene 1	8.33799
	CTNNB1	Catenin Beta 1	8.33527
	AKT2	AKT Serine/Threonine Kinase 2	8.31889
	APP	Amyloid Beta Precursor Protein	8.25981
	STAT1	Signal Transducer And Activator Of Transcription 1	8.2035
	CIAPIN1P	Cytokine Induced Apoptosis Inhibitor 1 Pseudogene	8.17662
	TRIAP1P1	TP53 Regulated Inhibitor Of Apoptosis 1 Pseudogene 1	8.17662
	API5P2	Apoptosis Inhibitor 5 Pseudogene 2	8.17662
	ENSG00000228998	PERP, TP53 Apoptosis Effector (PERP) Pseudogene	8.17662
	ENSG00000271253	Apoptosis-Inducing, TAF9-Like Domain 1, Pseudogene	8.17662
	ENSG00000271623	PRKC, Apoptosis, WT1, Regulator (PAWR) Pseudogene	8.17662
	LOC100505995	Apoptosis-Inducing, TAF9-Like Domain 1 Pseudogene	8.17662
	XIAPP1	X-Linked Inhibitor Of Apoptosis Pseudogene 1	8.17662
	ENSG00000218073	PERP, TP53 Apoptosis Effector (PERP) Pseudogene	8.17662
	ENSG00000259286	Cytokine Induced Apoptosis Inhibitor 1 (CIAPIN1)	8.17662
	LOC100131159	PERP, TP53 Apoptosis Effector Pseudogene	8.17662
	LOC390600	Cytokine Induced Apoptosis Inhibitor 1 Pseudogene	8.17662
	ENSG00000237653	PERP, TP53 Apoptosis Effector (PERP) Pseudogene	8.17662
	ENSG00000288255	Caspase 1, Apoptosis-Related Cysteine Peptidase (Interleukin 1, Beta, Convertase) (CASP1) Pseudogene	8.17662
	LOC100129725	PERP, TP53 Apoptosis Effector Pseudogene	8.17662
	LOC124903553	P53 Apoptosis Effector Related To PMP-22-Like	8.17662
	BCL2A1	BCL2 Related Protein A1	8.1555
	PDCD5	Programmed Cell Death 5	8.14308
	RASGRP1	RAS Guanyl Releasing Protein 1	8.14216
	PPARG	Peroxisome Proliferator Activated Receptor Gamma	8.08038
	MIR21	MicroRNA 21	8.05237
	ABL1	ABL Proto-Oncogene 1, Non-Receptor Tyrosine Kinase	7.98398
	PTK2	Protein Tyrosine Kinase 2	7.95951
	TRAF1	TNF Receptor Associated Factor 1	7.92928
	ESR1	Estrogen Receptor 1	7.89999
	HSPB1	Heat Shock Protein Family B (Small) Member 1	7.85767
	THAP1	THAP Domain Containing 1	7.85291
	IL6	Interleukin 6	7.83201
	FAF1	Fas Associated Factor 1	7.823
	AKT3	AKT Serine/Threonine Kinase 3	7.76153
	RB1	RB Transcriptional Corepressor 1	7.75715
	IL1B	Interleukin 1 Beta	7.68839
	MAP2K1	Mitogen-Activated Protein Kinase Kinase 1	7.6654
	DAPK1	Death Associated Protein Kinase 1	7.65334
	RIPK2	Receptor Interacting Serine/Threonine Kinase 2	7.62608
	SYVN1	Synoviolin 1	7.60835
	GSK3B	Glycogen Synthase Kinase 3 Beta	7.60104
	BIRC8	Baculoviral IAP Repeat Containing 8	7.5506
	HMGB1	High Mobility Group Box 1	7.54826
	CHUK	Component Of Inhibitor Of Nuclear Factor Kappa B Kinase Complex	7.53253
	NFE2L2	NFE2 Like BZIP Transcription Factor 2	7.50535
	STK4	Serine/Threonine Kinase 4	7.50118
	SRC	SRC Proto-Oncogene, Non-Receptor Tyrosine Kinase	7.48796
	PML	PML Nuclear Body Scaffold	7.47847
	HRAS	HRas Proto-Oncogene, GTPase	7.47643
	CHEK2	Checkpoint Kinase 2	7.47599
	PIK3CA	Phosphatidylinositol-4,5-Bisphosphate 3-Kinase Catalytic Subunit Alpha	7.42448
	CDKN1B	Cyclin Dependent Kinase Inhibitor 1B	7.41568
	TERT	Telomerase Reverse Transcriptase	7.37269
	TNFRSF1B	TNF Receptor Superfamily Member 1B	7.3296
	PCNA	Proliferating Cell Nuclear Antigen	7.28293
	NGF	Nerve Growth Factor	7.27143
	RNF34	Ring Finger Protein 34	7.26956
	CD4	CD4 Molecule	7.24503
	TNFAIP3	TNF Alpha Induced Protein 3	7.23631
	YWHAB	Tyrosine 3-Monooxygenase/Tryptophan 5-Monooxygenase Activation Protein Beta	7.2265
	BIRC6	Baculoviral IAP Repeat Containing 6	7.20727
	IKBKB	Inhibitor Of Nuclear Factor Kappa B Kinase Subunit Beta	7.19433
	TXN	Thioredoxin	7.17128
	NR3C1	Nuclear Receptor Subfamily 3 Group C Member 1	7.15741
	BRCA1	BRCA1 DNA Repair Associated	7.15489
	MAP3K1	Mitogen-Activated Protein Kinase Kinase Kinase 1	7.15271
	PAK2	P21 (RAC1) Activated Kinase 2	7.14328
	NR4A1	Nuclear Receptor Subfamily 4 Group A Member 1	7.13654
	SOD1	Superoxide Dismutase 1	7.12686
	CAT	Catalase	7.11307
	HSPA4	Heat Shock Protein Family A (Hsp70) Member 4	7.07264
	ENDOG	Endonuclease G	7.07214
	CD40	CD40 Molecule	7.02946
	HMOX1	Heme Oxygenase 1	6.96509
	JAK2	Janus Kinase 2	6.96207
	EGF	Epidermal Growth Factor	6.93213
	CCNA2	Cyclin A2	6.93089
	IRF1	Interferon Regulatory Factor 1	6.92575
	PRPF8	Pre-MRNA Processing Factor 8	6.91819
	SOD2	Superoxide Dismutase 2	6.91051
	TNFRSF11B	TNF Receptor Superfamily Member 11b	6.90552
	IL10	Interleukin 10	6.88885
	HSP90AA1	Heat Shock Protein 90 Alpha Family Class A Member 1	6.88663
	NLRP1	NLR Family Pyrin Domain Containing 1	6.87367
	IL3	Interleukin 3	6.87263
	YWHAQ	Tyrosine 3-Monooxygenase/Tryptophan 5-Monooxygenase Activation Protein Theta	6.8692
	CCNB1	Cyclin B1	6.86173
	IFNA1	Interferon Alpha 1	6.86128
	IKBKG	Inhibitor Of Nuclear Factor Kappa B Kinase Regulatory Subunit Gamma	6.84207
	MAP2K4	Mitogen-Activated Protein Kinase Kinase 4	6.81775
	CARD8	Caspase Recruitment Domain Family Member 8	6.7804
	TET2-AS1	TET2 Antisense RNA 1	6.76428
	PDCD6IP	Programmed Cell Death 6 Interacting Protein	6.75848
	STK17B	Serine/Threonine Kinase 17b	6.73734
	IGFBP3	Insulin Like Growth Factor Binding Protein 3	6.72632
	CDK4	Cyclin Dependent Kinase 4	6.72223
	IFI27	Interferon Alpha Inducible Protein 27	6.72151
	HDAC9	Histone Deacetylase 9	6.68502
	PRKCA	Protein Kinase C Alpha	6.67578
	IL2RA	Interleukin 2 Receptor Subunit Alpha	6.6712
	STK17A	Serine/Threonine Kinase 17a	6.64475
	CDK5	Cyclin Dependent Kinase 5	6.62356
	AR	Androgen Receptor	6.60805
	ERBB2	Erb-B2 Receptor Tyrosine Kinase 2	6.56559
	YWHAE	Tyrosine 3-Monooxygenase/Tryptophan 5-Monooxygenase Activation Protein Epsilon	6.54997
	FOS	Fos Proto-Oncogene, AP-1 Transcription Factor Subunit	6.50552
	SMPD1	Sphingomyelin Phosphodiesterase 1	6.47833
	ATG5	Autophagy Related 5	6.45922
	MAP3K7	Mitogen-Activated Protein Kinase Kinase Kinase 7	6.45737
	HIPK2	Homeodomain Interacting Protein Kinase 2	6.45559
	PRKN	Parkin RBR E3 Ubiquitin Protein Ligase	6.4264
	CTSD	Cathepsin D	6.40821
	KRT18	Keratin 18	6.40605
	NOS2	Nitric Oxide Synthase 2	6.35175
	TP63	Tumor Protein P63	6.32479
	HDAC1	Histone Deacetylase 1	6.31399
	SP1	Sp1 Transcription Factor	6.30458
	TNFRSF6B	TNF Receptor Superfamily Member 6b	6.30449
	TNFSF11	TNF Superfamily Member 11	6.30209
	CDH1	Cadherin 1	6.27558
	ABCB1	ATP Binding Cassette Subfamily B Member 1	6.27464
	BNIP3	BCL2 Interacting Protein 3	6.26962
	ATR	ATR Serine/Threonine Kinase	6.26536
	PDCD4	Programmed Cell Death 4	6.25679
	SQSTM1	Sequestosome 1	6.25541
	MADD	MAP Kinase Activating Death Domain	6.24885
	CASP12	Caspase 12 (Gene/Pseudogene)	6.24791
	IER3IP1	Immediate Early Response 3 Interacting Protein 1	6.22049
	CSNK2A1	Casein Kinase 2 Alpha 1	6.18782
	DNM1L	Dynamin 1 Like	6.17738
	RARA	Retinoic Acid Receptor Alpha	6.1457
	DAPK3	Death Associated Protein Kinase 3	6.1356
	LGALS1	Galectin 1	6.12011
	YAP1	Yes1 Associated Transcriptional Regulator	6.11554
	HSPA1A	Heat Shock Protein Family A (Hsp70) Member 1A	6.10904
	TNFSF13B	TNF Superfamily Member 13b	6.10752
	PDCD10	Programmed Cell Death 10	6.10025
	PRKCE	Protein Kinase C Epsilon	6.09862
	IRF3	Interferon Regulatory Factor 3	6.09689
	BDNF	Brain Derived Neurotrophic Factor	6.09125
	CD40LG	CD40 Ligand	6.08885
	CXCR4	C-X-C Motif Chemokine Receptor 4	6.06896
	YWHAZ	Tyrosine 3-Monooxygenase/Tryptophan 5-Monooxygenase Activation Protein Zeta	6.05128
	FAM215A	Family With Sequence Similarity 215 Member A	6.03959
	TIGAR	TP53 Induced Glycolysis Regulatory Phosphatase	6.01891
	TGM2	Transglutaminase 2	6.01519
	GAS2	Growth Arrest Specific 2	6.01301
	NGFR	Nerve Growth Factor Receptor	6.00532
	PRF1	Perforin 1	5.99632
	FOXO1	Forkhead Box O1	5.98101
	BAG1	BAG Cochaperone 1	5.97026
	FLT3	Fms Related Receptor Tyrosine Kinase 3	5.95804
	PIM1	Pim-1 Proto-Oncogene, Serine/Threonine Kinase	5.90271
	CXCL8	C-X-C Motif Chemokine Ligand 8	5.88718
	PLK1	Polo Like Kinase 1	5.88081
	FHIT	Fragile Histidine Triad Diadenosine Triphosphatase	5.87252
	PIK3R1	Phosphoinositide-3-Kinase Regulatory Subunit 1	5.85809
	PTPA	Protein Phosphatase 2 Phosphatase Activator	5.84548
	IER3	Immediate Early Response 3	5.79461
	PIDD1	P53-Induced Death Domain Protein 1	5.7934
	PRKCI	Protein Kinase C Iota	5.78728
	STK11	Serine/Threonine Kinase 11	5.77861
	IL15	Interleukin 15	5.77339
	IL24	Interleukin 24	5.74224
	CHEK1	Checkpoint Kinase 1	5.74156
	GSN	Gelsolin	5.71065
	CD27	CD27 Molecule	5.70126
	CARD16	Caspase Recruitment Domain Family Member 16	5.68138
	EP300	E1A Binding Protein P300	5.67583
	WWOX	WW Domain Containing Oxidoreductase	5.67381
	MMP9	Matrix Metallopeptidase 9	5.66982
	DNASE1L3	Deoxyribonuclease 1 Like 3	5.6527
	PTPN13	Protein Tyrosine Phosphatase Non-Receptor Type 13	5.62535
	YWHAG	Tyrosine 3-Monooxygenase/Tryptophan 5-Monooxygenase Activation Protein Gamma	5.61298
	RPS3	Ribosomal Protein S3	5.60404
	CRADD	CASP2 And RIPK1 Domain Containing Adaptor With Death Domain	5.59451
	JAK1	Janus Kinase 1	5.5855
	TIA1	TIA1 Cytotoxic Granule Associated RNA Binding Protein	5.57616
	PLEKHF1	Pleckstrin Homology And FYVE Domain Containing 1	5.57313
	YWHAH	Tyrosine 3-Monooxygenase/Tryptophan 5-Monooxygenase Activation Protein Eta	5.56624
	SPHK1	Sphingosine Kinase 1	5.55361
	STK3	Serine/Threonine Kinase 3	5.53955
	TRAF6	TNF Receptor Associated Factor 6	5.49327
	H2AX	H2A.X Variant Histone	5.48773
	CDK6	Cyclin Dependent Kinase 6	5.44255
	NOTCH1	Notch Receptor 1	5.43453
	TNFRSF21	TNF Receptor Superfamily Member 21	5.40071
	ACIN1	Apoptotic Chromatin Condensation Inducer 1	5.39521
	BMF	Bcl2 Modifying Factor	5.39039
	EIF2AK2	Eukaryotic Translation Initiation Factor 2 Alpha Kinase 2	5.38061
	TNFSF14	TNF Superfamily Member 14	5.37997
	ITPR1	Inositol 1,4,5-Trisphosphate Receptor Type 1	5.33121
	PPP1R13L	Protein Phosphatase 1 Regulatory Subunit 13 Like	5.32042
	SHC1	SHC Adaptor Protein 1	5.28262
	KIT	KIT Proto-Oncogene, Receptor Tyrosine Kinase	5.26653
	CIDEC	Cell Death Inducing DFFA Like Effector C	5.24586
	KDR	Kinase Insert Domain Receptor	5.2381
	TLR2	Toll Like Receptor 2	5.23705
	PRKCB	Protein Kinase C Beta	5.23298
	MIR34A	MicroRNA 34a	5.22301
	BMP6	Bone Morphogenetic Protein 6	5.21729
	GDF15	Growth Differentiation Factor 15	5.20432
	LGALS3	Galectin 3	5.19874
	TRAF3	TNF Receptor Associated Factor 3	5.19417
	BCL10	BCL10 Immune Signaling Adaptor	5.18408
	ATRAID	All-Trans Retinoic Acid Induced Differentiation Factor	5.17775
	TLR4	Toll Like Receptor 4	5.16784
	MIR146A	MicroRNA 146a	5.14514
	CIDEA	Cell Death Inducing DFFA Like Effector A	5.14242
	NPM1	Nucleophosmin 1	5.13579
	EIF2S1	Eukaryotic Translation Initiation Factor 2 Subunit Alpha	5.12338
	TNFRSF12A	TNF Receptor Superfamily Member 12A	5.09196
	TOP1.00	DNA Topoisomerase I	5.07081
	IL5	Interleukin 5	5.05734
	MAP3K14	Mitogen-Activated Protein Kinase Kinase Kinase 14	5.0513
	BCAP31	B Cell Receptor Associated Protein 31	5.03966
	FGF2	Fibroblast Growth Factor 2	5.0372
	GADD45A	Growth Arrest And DNA Damage Inducible Alpha	5.033
	ERN1.00	Endoplasmic Reticulum To Nucleus Signaling 1	5.01116
	CD5L	CD5 Molecule Like	5.00378
	GAS5	Growth Arrest Specific 5	4.99495
	BRAF	B-Raf Proto-Oncogene, Serine/Threonine Kinase	4.98313
	NTRK1	Neurotrophic Receptor Tyrosine Kinase 1	4.97302
	INS	Insulin	4.96697
	STK24	Serine/Threonine Kinase 24	4.96379
	CREB1	CAMP Responsive Element Binding Protein 1	4.95704
	PPP1R15A	Protein Phosphatase 1 Regulatory Subunit 15A	4.95084
	CDKN3	Cyclin Dependent Kinase Inhibitor 3	4.94846
	MALAT1	Metastasis Associated Lung Adenocarcinoma Transcript 1	4.94046
	KAT5	Lysine Acetyltransferase 5	4.93393
	GAPDH	Glyceraldehyde-3-Phosphate Dehydrogenase	4.92608
	HGF	Hepatocyte Growth Factor	4.92117
	THOC1	THO Complex 1	4.92098
	OLR1	Oxidized Low Density Lipoprotein Receptor 1	4.91041
	CENPS	Centromere Protein S	4.90112
	FGFR3	Fibroblast Growth Factor Receptor 3	4.89579
	DNAJA3	DnaJ Heat Shock Protein Family (Hsp40) Member A3	4.88428
	MET	MET Proto-Oncogene, Receptor Tyrosine Kinase	4.88167
	BAG3	BAG Cochaperone 3	4.88114
	UACA	Uveal Autoantigen With Coiled-Coil Domains And Ankyrin Repeats	4.88049
	BNIP3L	BCL2 Interacting Protein 3 Like	4.88002
	ICAM1	Intercellular Adhesion Molecule 1	4.87472
	CDC25C	Cell Division Cycle 25C	4.86552
	DEDD	Death Effector Domain Containing	4.85966
	MT-RNR2	Mitochondrially Encoded 16S RRNA	4.85293
	ESR2	Estrogen Receptor 2	4.84339
	CASP8AP2	Caspase 8 Associated Protein 2	4.84041
	IL1A	Interleukin 1 Alpha	4.81991
	CTSB	Cathepsin B	4.81473
	NQO1	NAD(P)H Quinone Dehydrogenase 1	4.8036
	BAG6	BAG Cochaperone 6	4.80297
	RPS6KB1	Ribosomal Protein S6 Kinase B1	4.7931
	SPP1	Secreted Phosphoprotein 1	4.79111
	REL	REL Proto-Oncogene, NF-KB Subunit	4.7849
	PDCD1	Programmed Cell Death 1	4.77995
	IL4	Interleukin 4	4.77801
	TSC2	TSC Complex Subunit 2	4.77704
	MAPK8IP1	Mitogen-Activated Protein Kinase 8 Interacting Protein 1	4.77403
	RBM5	RNA Binding Motif Protein 5	4.75849
	PCSK9	Proprotein Convertase Subtilisin/Kexin Type 9	4.75368
	RARB	Retinoic Acid Receptor Beta	4.74914
	VIM	Vimentin	4.74782
	NDRG1	N-Myc Downstream Regulated 1	4.74124
	DAPK2	Death Associated Protein Kinase 2	4.73969
	PRKCZ	Protein Kinase C Zeta	4.71398
	CENPS-CORT	CENPS-CORT Readthrough	4.70431
	PLEKHF2	Pleckstrin Homology And FYVE Domain Containing 2	4.69779
	ATF2	Activating Transcription Factor 2	4.69579
	RNASEL	Ribonuclease L	4.68758
	UNC5B	Unc-5 Netrin Receptor B	4.68381
	EPO	Erythropoietin	4.68378
	NFKB2	Nuclear Factor Kappa B Subunit 2	4.68082
	EGR1	Early Growth Response 1	4.67534
	OPA1	OPA1 Mitochondrial Dynamin Like GTPase	4.65973
	LCK	LCK Proto-Oncogene, Src Family Tyrosine Kinase	4.63844
	FGFR2	Fibroblast Growth Factor Receptor 2	4.61939
	PTRH2	Peptidyl-TRNA Hydrolase 2	4.61118
	MDM4	MDM4 Regulator Of P53	4.59969
	SLC25A6	Solute Carrier Family 25 Member 6	4.59761
	STPG1	Sperm Tail PG-Rich Repeat Containing 1	4.59019
	HSPD1	Heat Shock Protein Family D (Hsp60) Member 1	4.58099
	BAG4	BAG Cochaperone 4	4.58087
	MAPK11	Mitogen-Activated Protein Kinase 11	4.57676
	FNIP2	Folliculin Interacting Protein 2	4.56799
	XBP1	X-Box Binding Protein 1	4.56399
	BCL2L12	BCL2 Like 12	4.56128
	GORASP1	Golgi Reassembly Stacking Protein 1	4.53099
	SLC25A5	Solute Carrier Family 25 Member 5	4.52568
	DAD1	Defender Against Cell Death 1	4.52045
	BMP2	Bone Morphogenetic Protein 2	4.5163
	MKI67	Marker Of Proliferation Ki-67	4.50974
	MFN2	Mitofusin 2	4.50125
	ACHE	Acetylcholinesterase (Cartwright Blood Group)	4.50054
	CXCL12	C-X-C Motif Chemokine Ligand 12	4.49947
	ERBB4	Erb-B2 Receptor Tyrosine Kinase 4	4.48332
	SUMO1	Small Ubiquitin Like Modifier 1	4.48318
	STAT5A	Signal Transducer And Activator Of Transcription 5A	4.47525
	PSEN1	Presenilin 1	4.47075
	RASSF1	Ras Association Domain Family Member 1	4.46791
	AXIN1	Axin 1	4.46767
	LMNB1	Lamin B1	4.45291
	FASN	Fatty Acid Synthase	4.4438
	SFRP1	Secreted Frizzled Related Protein 1	4.44358
	HSP90AB1	Heat Shock Protein 90 Alpha Family Class B Member 1	4.44268
	MAP2K6	Mitogen-Activated Protein Kinase Kinase 6	4.44181
	BMP4	Bone Morphogenetic Protein 4	4.42648
	CSF2	Colony Stimulating Factor 2	4.42332
	PRKD1	Protein Kinase D1	4.42236
	EZH2	Enhancer Of Zeste 2 Polycomb Repressive Complex 2 Subunit	4.42087
	SIAH1	Siah E3 Ubiquitin Protein Ligase 1	4.41947
	FCMR	Fc Mu Receptor	4.41475
	C1QBP	Complement C1q Binding Protein	4.41229
	MEF2A	Myocyte Enhancer Factor 2A	4.41057
	SLC25A4	Solute Carrier Family 25 Member 4	4.40507
	CAV1	Caveolin 1	4.40484
	LYN	LYN Proto-Oncogene, Src Family Tyrosine Kinase	4.40053
	NOS3	Nitric Oxide Synthase 3	4.39828
	CDK11B	Cyclin Dependent Kinase 11B	4.38807
	NLRP3	NLR Family Pyrin Domain Containing 3	4.38595
	SATB1	SATB Homeobox 1	4.38229
	KITLG	KIT Ligand	4.37597
	HSPA8	Heat Shock Protein Family A (Hsp70) Member 8	4.36652
	BCL2L2-PABPN1	BCL2L2-PABPN1 Readthrough	4.36293
	ODC1	Ornithine Decarboxylase 1	4.36107
	SPHK2	Sphingosine Kinase 2	4.34533
	EIF2AK3	Eukaryotic Translation Initiation Factor 2 Alpha Kinase 3	4.34368
	BTK	Bruton Tyrosine Kinase	4.3403
	MYCN	MYCN Proto-Oncogene, BHLH Transcription Factor	4.3342
	IRS1	Insulin Receptor Substrate 1	4.33128
	MAPT	Microtubule Associated Protein Tau	4.33094
	ZC3H12A	Zinc Finger CCCH-Type Containing 12A	4.3056
	SMAD7	SMAD Family Member 7	4.29679
	IL17A	Interleukin 17A	4.28692
	LTBR	Lymphotoxin Beta Receptor	4.2869
	MEG3	Maternally Expressed 3	4.28261
	MALT1	MALT1 Paracaspase	4.28127
	IFNB1	Interferon Beta 1	4.27975
	AIMP1	Aminoacyl TRNA Synthetase Complex Interacting Multifunctional Protein 1	4.27124
	TXN2	Thioredoxin 2	4.26493
	TSC1	TSC Complex Subunit 1	4.26138
	MAP2K7	Mitogen-Activated Protein Kinase Kinase 7	4.25975
	DPF2	Double PHD Fingers 2	4.2506
	EI24	EI24 Autophagy Associated Transmembrane Protein	4.24113
	PAK1	P21 (RAC1) Activated Kinase 1	4.23849
	FAIM2	Fas Apoptotic Inhibitory Molecule 2	4.23576
	HK2	Hexokinase 2	4.22597
	RAC1	Rac Family Small GTPase 1	4.22343
	LMNA	Lamin A/C	4.22226
	TAX1BP1	Tax1 Binding Protein 1	4.22218
	TIAL1	TIA1 Cytotoxic Granule Associated RNA Binding Protein Like 1	4.21979
	CSNK2A2	Casein Kinase 2 Alpha 2	4.2185
	UNC5A	Unc-5 Netrin Receptor A	4.2148
	NOX4	NADPH Oxidase 4	4.20994
	MIR145	MicroRNA 145	4.20238
	SH3GLB1	SH3 Domain Containing GRB2 Like, Endophilin B1	4.19622
	LCN2	Lipocalin 2	4.19291
	DAP3	Death Associated Protein 3	4.18611
	AURKA	Aurora Kinase A	4.18515
	IL9	Interleukin 9	4.17975
	RET	Ret Proto-Oncogene	4.16921
	ALOX12	Arachidonate 12-Lipoxygenase, 12S Type	4.1687
	PHLDA1	Pleckstrin Homology Like Domain Family A Member 1	4.16714
	NTRK2	Neurotrophic Receptor Tyrosine Kinase 2	4.1505
	PTK2B	Protein Tyrosine Kinase 2 Beta	4.15041
	CSF3	Colony Stimulating Factor 3	4.14862
	HOTAIR	HOX Transcript Antisense RNA	4.14613
	TRAF5	TNF Receptor Associated Factor 5	4.13984
	BCL2L15	BCL2 Like 15	4.13883
	RELB	RELB Proto-Oncogene, NF-KB Subunit	4.12399
	GCG	Glucagon	4.1218
	CARD11	Caspase Recruitment Domain Family Member 11	4.11808
	SMAD2	SMAD Family Member 2	4.08208
	S100A9	S100 Calcium Binding Protein A9	4.06188
	PPM1D	Protein Phosphatase, Mg2+/Mn2+ Dependent 1D	4.06083
	CD274	CD274 Molecule	4.05887
	IFIH1	Interferon Induced With Helicase C Domain 1	4.05804
	GSK3A	Glycogen Synthase Kinase 3 Alpha	4.05625
	ANXA1	Annexin A1	4.04961
	DUSP19	Dual Specificity Phosphatase 19	4.04863
	SPTAN1	Spectrin Alpha, Non-Erythrocytic 1	4.04816
	PTPN11	Protein Tyrosine Phosphatase Non-Receptor Type 11	4.04349
	TMBIM6	Transmembrane BAX Inhibitor Motif Containing 6	4.04057
	TG	Thyroglobulin	4.03379
	GIMAP5	GTPase, IMAP Family Member 5	4.02843
	TNFRSF13B	TNF Receptor Superfamily Member 13B	4.02684
	CASP16P	Caspase 16, Pseudogene	4.01534
	CXCR3	C-X-C Motif Chemokine Receptor 3	4.01241
	SET	SET Nuclear Proto-Oncogene	4.01082
	PIK3CB	Phosphatidylinositol-4,5-Bisphosphate 3-Kinase Catalytic Subunit Beta	4.0099
	DYNLL1	Dynein Light Chain LC8-Type 1	4.006
	PHLPP1	PH Domain And Leucine Rich Repeat Protein Phosphatase 1	4.0025
	FAIM	Fas Apoptotic Inhibitory Molecule	3.99371
	GADD45B	Growth Arrest And DNA Damage Inducible Beta	3.99179
	CTLA4	Cytotoxic T-Lymphocyte Associated Protein 4	3.99142
	PINK1	PTEN Induced Kinase 1	3.99091
	IGF2	Insulin Like Growth Factor 2	3.9897
	STAT5B	Signal Transducer And Activator Of Transcription 5B	3.98563
	PDPK1	3-Phosphoinositide Dependent Protein Kinase 1	3.97652
	HBB	Hemoglobin Subunit Beta	3.97652
	CBL	Cbl Proto-Oncogene	3.97277
	PRKDC	Protein Kinase, DNA-Activated, Catalytic Subunit	3.96306
	DUSP1	Dual Specificity Phosphatase 1	3.952
	MLKL	Mixed Lineage Kinase Domain Like Pseudokinase	3.94642
	THAP3	THAP Domain Containing 3	3.93875
	PRKCQ	Protein Kinase C Theta	3.93797
	BCL6	BCL6 Transcription Repressor	3.9371
	MEF2D	Myocyte Enhancer Factor 2D	3.93569
	MMP2	Matrix Metallopeptidase 2	3.92978
	XRCC6	X-Ray Repair Cross Complementing 6	3.9266
	CAPN1	Calpain 1	3.91816
	LEP	Leptin	3.91811
	TNFSF13	TNF Superfamily Member 13	3.91702
	RHOB	Ras Homolog Family Member B	3.91067
	HTT	Huntingtin	3.90763
	ITGB1	Integrin Subunit Beta 1	3.90444
	RFFL	Ring Finger And FYVE Like Domain Containing E3 Ubiquitin Protein Ligase	3.90156
	CCND3	Cyclin D3	3.89893
	CDC25A	Cell Division Cycle 25A	3.89639
	HDAC2	Histone Deacetylase 2	3.89278
	JUND	JunD Proto-Oncogene, AP-1 Transcription Factor Subunit	3.88501
	AXL	AXL Receptor Tyrosine Kinase	3.88057
	RAC2	Rac Family Small GTPase 2	3.87824
	APC	APC Regulator Of WNT Signaling Pathway	3.8757
	ATF3	Activating Transcription Factor 3	3.86454
	PRKAA1	Protein Kinase AMP-Activated Catalytic Subunit Alpha 1	3.86386
	CD28	CD28 Molecule	3.86376
	S100A8	S100 Calcium Binding Protein A8	3.86234
	SH2D1A	SH2 Domain Containing 1A	3.86026
	TNFSF15	TNF Superfamily Member 15	3.8594
	GSDME	Gasdermin E	3.85358
	NUPR1	Nuclear Protein 1, Transcriptional Regulator	3.85255
	ROCK1	Rho Associated Coiled-Coil Containing Protein Kinase 1	3.8472
	APOE	Apolipoprotein E	3.84682
	APEX1	Apurinic/Apyrimidinic Endodeoxyribonuclease 1	3.81988
	PPARA	Peroxisome Proliferator Activated Receptor Alpha	3.81818
	THBS1	Thrombospondin 1	3.81472
	TIMP1	TIMP Metallopeptidase Inhibitor 1	3.8137
	ING1	Inhibitor Of Growth Family Member 1	3.81368
	IAPP	Islet Amyloid Polypeptide	3.80393
	LGALS9	Galectin 9	3.80079
	TGFBR1	Transforming Growth Factor Beta Receptor 1	3.80077
	ZFAT	Zinc Finger And AT-Hook Domain Containing	3.79491
	LOC111255642	TNFRSF10B 5' Regulatory Region	3.79334
	CELF2	CUGBP Elav-Like Family Member 2	3.79127
	PPP2CA	Protein Phosphatase 2 Catalytic Subunit Alpha	3.78963
	MIF	Macrophage Migration Inhibitory Factor	3.78874
	ASAH2	N-Acylsphingosine Amidohydrolase 2	3.78579
	PTPRC	Protein Tyrosine Phosphatase Receptor Type C	3.78316
	ITGAM	Integrin Subunit Alpha M	3.7809
	TNFRSF8	TNF Receptor Superfamily Member 8	3.78019
	PPM1F	Protein Phosphatase, Mg2+/Mn2+ Dependent 1F	3.77897
	ERBB3	Erb-B2 Receptor Tyrosine Kinase 3	3.77865
	PKN1	Protein Kinase N1	3.77629
	CDK5R1	Cyclin Dependent Kinase 5 Regulatory Subunit 1	3.77611
	SFN	Stratifin	3.76959
	BNIP1	BCL2 Interacting Protein 1	3.76868
	MLH1	MutL Homolog 1	3.76561
	DNMT1	DNA Methyltransferase 1	3.76277
	PRKCH	Protein Kinase C Eta	3.75927
	MIR155	MicroRNA 155	3.75399
	DIDO1	Death Inducer-Obliterator 1	3.74782
	SFRP2	Secreted Frizzled Related Protein 2	3.74611
	TGFA	Transforming Growth Factor Alpha	3.74261
	AGER	Advanced Glycosylation End-Product Specific Receptor	3.74137
	NOS1	Nitric Oxide Synthase 1	3.74086
	TYMP	Thymidine Phosphorylase	3.73238
	LTA	Lymphotoxin Alpha	3.72172
	PIK3R2	Phosphoinositide-3-Kinase Regulatory Subunit 2	3.72048
	MAP3K6	Mitogen-Activated Protein Kinase Kinase Kinase 6	3.71702
	MIR221	MicroRNA 221	3.71225
	TFAP2A	Transcription Factor AP-2 Alpha	3.70946
	CCL2	C-C Motif Chemokine Ligand 2	3.70661
	PRKAB1	Protein Kinase AMP-Activated Non-Catalytic Subunit Beta 1	3.70163
	RHOA	Ras Homolog Family Member A	3.70014
	FOXP3	Forkhead Box P3	3.69489
	TIMP3	TIMP Metallopeptidase Inhibitor 3	3.68113
	IFI6	Interferon Alpha Inducible Protein 6	3.67949
	SMPD2	Sphingomyelin Phosphodiesterase 2	3.67771
	SERPINB5	Serpin Family B Member 5	3.67537
	ATF4	Activating Transcription Factor 4	3.67234
	YY1	YY1 Transcription Factor	3.67019
	PIM3	Pim-3 Proto-Oncogene, Serine/Threonine Kinase	3.66522
	PPIA	Peptidylprolyl Isomerase A	3.6647
	TSPO	Translocator Protein	3.65944
	SPATA4	Spermatogenesis Associated 4	3.65785
	TLR3	Toll Like Receptor 3	3.65382
	BCR	BCR Activator Of RhoGEF And GTPase	3.64825
	NEAT1	Nuclear Paraspeckle Assembly Transcript 1	3.63642
	SFRP4	Secreted Frizzled Related Protein 4	3.6345
	ATF6	Activating Transcription Factor 6	3.63151
	MAVS	Mitochondrial Antiviral Signaling Protein	3.62767
	PLK3	Polo Like Kinase 3	3.62118
	LATS2	Large Tumor Suppressor Kinase 2	3.62084
	TGFBR2	Transforming Growth Factor Beta Receptor 2	3.61359
	EIF5A	Eukaryotic Translation Initiation Factor 5A	3.61213
	GDNF	Glial Cell Derived Neurotrophic Factor	3.60542
	PLSCR1	Phospholipid Scramblase 1	3.60341
	TFRC	Transferrin Receptor	3.60128
	RNF144B	Ring Finger Protein 144B	3.60011
	SRGN	Serglycin	3.59859
	CTSG	Cathepsin G	3.59745
	IL13	Interleukin 13	3.59719
	HAX1	HCLS1 Associated Protein X-1	3.59552
	SOX4	SRY-Box Transcription Factor 4	3.5949
	RARS1	Arginyl-TRNA Synthetase 1	3.59123
	IL18	Interleukin 18	3.58977
	HNRNPA1	Heterogeneous Nuclear Ribonucleoprotein A1	3.58644
	HDAC3	Histone Deacetylase 3	3.57994
	TFPT	TCF3 Fusion Partner	3.57725
	CDK11A	Cyclin Dependent Kinase 11A	3.57687
	PIM2	Pim-2 Proto-Oncogene, Serine/Threonine Kinase	3.57585
	GAS6	Growth Arrest Specific 6	3.56752
	RACK1	Receptor For Activated C Kinase 1	3.56603
	NOD1	Nucleotide Binding Oligomerization Domain Containing 1	3.56071
	TAF6	TATA-Box Binding Protein Associated Factor 6	3.55858
	SIRT3	Sirtuin 3	3.55777
	FIS1	Fission, Mitochondrial 1	3.55289
	CAPN2	Calpain 2	3.55249
	DNAJB13	DnaJ Heat Shock Protein Family (Hsp40) Member B13	3.54869
	DAB2IP	DAB2 Interacting Protein	3.54112
	THAP2	THAP Domain Containing 2	3.53915
	RPS6KA1	Ribosomal Protein S6 Kinase A1	3.53791
	MIR29B1	MicroRNA 29b-1	3.53709
	ID1	Inhibitor Of DNA Binding 1, HLH Protein	3.53433
	NRG1	Neuregulin 1	3.5318
	ITGB3BP	Integrin Subunit Beta 3 Binding Protein	3.53158
	PRDX1	Peroxiredoxin 1	3.53124
	PRNP	Prion Protein	3.51069
	NR1H2	Nuclear Receptor Subfamily 1 Group H Member 2	3.50709
	TNFRSF9	TNF Receptor Superfamily Member 9	3.50597
	SKP2	S-Phase Kinase Associated Protein 2	3.50536
	SMAD4	SMAD Family Member 4	3.50095
	PTGES	Prostaglandin E Synthase	3.50021
	CD8A	CD8a Molecule	3.49638
	KMT2A	Lysine Methyltransferase 2A	3.49546
	TUG1	Taurine Up-Regulated 1	3.49536
	CD44	CD44 Molecule (Indian Blood Group)	3.49193
	CXCL10	C-X-C Motif Chemokine Ligand 10	3.49122
	RASSF6	Ras Association Domain Family Member 6	3.48698
	P2RX7	Purinergic Receptor P2X 7	3.48081
	VDAC2	Voltage Dependent Anion Channel 2	3.47798
	RAG1	Recombination Activating 1	3.47564
	DNASE1	Deoxyribonuclease 1	3.47055
	WT1	WT1 Transcription Factor	3.46761
	ITCH	Itchy E3 Ubiquitin Protein Ligase	3.46264
	CD36	CD36 Molecule	3.46231
	SOCS3	Suppressor Of Cytokine Signaling 3	3.45712
	KLF11	KLF Transcription Factor 11	3.45518
	ETS1	ETS Proto-Oncogene 1, Transcription Factor	3.45172
	NRP1	Neuropilin 1	3.44944
	MIR29A	MicroRNA 29a	3.43664
	PARK7	Parkinsonism Associated Deglycase	3.42628
	SAV1	Salvador Family WW Domain Containing Protein 1	3.4231
	GRB2	Growth Factor Receptor Bound Protein 2	3.42087
	MYB	MYB Proto-Oncogene, Transcription Factor	3.41987
	EAF2	ELL Associated Factor 2	3.41592
	TRIM28	Tripartite Motif Containing 28	3.41572
	ITGB4	Integrin Subunit Beta 4	3.41056
	GSTP1	Glutathione S-Transferase Pi 1	3.40851
	ABCC1	ATP Binding Cassette Subfamily C Member 1	3.40701
	SNCA	Synuclein Alpha	3.40532
	RPS27A	Ribosomal Protein S27a	3.40515
	MAX	MYC Associated Factor X	3.40364
	HSP90B1	Heat Shock Protein 90 Beta Family Member 1	3.40327
	ALOX5	Arachidonate 5-Lipoxygenase	3.39871
	MIR214	MicroRNA 214	3.39708
	JAK3	Janus Kinase 3	3.39191
	PDGFRB	Platelet Derived Growth Factor Receptor Beta	3.38645
	DEDD2	Death Effector Domain Containing 2	3.38563
	MAP2K3	Mitogen-Activated Protein Kinase Kinase 3	3.38434
	PLCG1	Phospholipase C Gamma 1	3.38267
	PVT1	Pvt1 Oncogene	3.37959
	PRDX2	Peroxiredoxin 2	3.3785
	USP7	Ubiquitin Specific Peptidase 7	3.37481
	PSIP1	PC4 And SFRS1 Interacting Protein 1	3.36632
	HSF1	Heat Shock Transcription Factor 1	3.36461
	CREBBP	CREB Binding Protein	3.36417
	IL7	Interleukin 7	3.36286
	TRIM27	Tripartite Motif Containing 27	3.36083
	RUNX2	RUNX Family Transcription Factor 2	3.35803
	AHR	Aryl Hydrocarbon Receptor	3.35601
	PPP1CA	Protein Phosphatase 1 Catalytic Subunit Alpha	3.35551
	PDCD2	Programmed Cell Death 2	3.35031
	EPHA3	EPH Receptor A3	3.34581
	ANGPT2	Angiopoietin 2	3.3453
	CCND2	Cyclin D2	3.3446
	NLRC4	NLR Family CARD Domain Containing 4	3.3439
	HUWE1	HECT, UBA And WWE Domain Containing E3 Ubiquitin Protein Ligase 1	3.33468
	TUBB	Tubulin Beta Class I	3.32522
	FEM1B	Fem-1 Homolog B	3.32207
	CCN4	Cellular Communication Network Factor 4	3.32101
	PTHLH	Parathyroid Hormone Like Hormone	3.3176
	HMGCR	3-Hydroxy-3-Methylglutaryl-CoA Reductase	3.31592
	TNFRSF4	TNF Receptor Superfamily Member 4	3.31208
	SGK1	Serum/Glucocorticoid Regulated Kinase 1	3.30572
	NUMA1	Nuclear Mitotic Apparatus Protein 1	3.30504
	DCC	DCC Netrin 1 Receptor	3.29886
	MPO	Myeloperoxidase	3.29519
	RALA	RAS Like Proto-Oncogene A	3.28788
	PIR	Pirin	3.28727
	BEX3	Brain Expressed X-Linked 3	3.27837
	MXD1	MAX Dimerization Protein 1	3.27809
	CCN1	Cellular Communication Network Factor 1	3.27678
	BUB1B	BUB1 Mitotic Checkpoint Serine/Threonine Kinase B	3.27359
	EIF4G2	Eukaryotic Translation Initiation Factor 4 Gamma 2	3.27355
	CD19	CD19 Molecule	3.26918
	SYK	Spleen Associated Tyrosine Kinase	3.26886
	TMBIM4	Transmembrane BAX Inhibitor Motif Containing 4	3.2668
	UBC	Ubiquitin C	3.26642
	EPHA2	EPH Receptor A2	3.26536
	MAPK13	Mitogen-Activated Protein Kinase 13	3.2653
	AURKB	Aurora Kinase B	3.26231
	MAP2K2	Mitogen-Activated Protein Kinase Kinase 2	3.25239
	CIDEB	Cell Death Inducing DFFA Like Effector B	3.25198
	PECAM1	Platelet And Endothelial Cell Adhesion Molecule 1	3.25021
	DKK1.00	Dickkopf WNT Signaling Pathway Inhibitor 1	3.25017
	F2R	Coagulation Factor II Thrombin Receptor	3.2486
	KLLN	Killin, P53 Regulated DNA Replication Inhibitor	3.24469
	GLI1	GLI Family Zinc Finger 1	3.24034
	ETS2	ETS Proto-Oncogene 2, Transcription Factor	3.2394
	MAGEH1	MAGE Family Member H1	3.22825
	ING3	Inhibitor Of Growth Family Member 3	3.22702
	HNRNPK	Heterogeneous Nuclear Ribonucleoprotein K	3.22532
	NTN1	Netrin 1	3.22502
	SFRP5	Secreted Frizzled Related Protein 5	3.22327
	PKM	Pyruvate Kinase M1/2	3.21779
	MIR143	MicroRNA 143	3.21405
	UBD	Ubiquitin D	3.21393
	VDR	Vitamin D Receptor	3.21156
	RALBP1	RalA Binding Protein 1	3.2114
	PLA2G6	Phospholipase A2 Group VI	3.21122
	LRBA	LPS Responsive Beige-Like Anchor Protein	3.21021
	PLSCR3	Phospholipid Scramblase 3	3.20994
	FYN	FYN Proto-Oncogene, Src Family Tyrosine Kinase	3.20886
	CD47	CD47 Molecule	3.20731
	E2F3	E2F Transcription Factor 3	3.20641
	UCA1	Urothelial Cancer Associated 1	3.20241
	TPT1	Tumor Protein, Translationally-Controlled 1	3.19722
	NLRP10	NLR Family Pyrin Domain Containing 10	3.19583
	CAPNS1	Calpain Small Subunit 1	3.19478
	GABARAP	GABA Type A Receptor-Associated Protein	3.19121
	PRKACA	Protein Kinase CAMP-Activated Catalytic Subunit Alpha	3.19016
	OSMR	Oncostatin M Receptor	3.18636
	THPO	Thrombopoietin	3.17778
	TYMS	Thymidylate Synthetase	3.17694
	MAP3K15	Mitogen-Activated Protein Kinase Kinase Kinase 15	3.16906
	MMP1	Matrix Metallopeptidase 1	3.16562
	NOD2	Nucleotide Binding Oligomerization Domain Containing 2	3.16241
	CSF1	Colony Stimulating Factor 1	3.16038
	WEE1	WEE1 G2 Checkpoint Kinase	3.15773
	UNC5D	Unc-5 Netrin Receptor D	3.15217
	ACP1	Acid Phosphatase 1	3.14895
	TICAM1	TIR Domain Containing Adaptor Molecule 1	3.14811
	HBEGF	Heparin Binding EGF Like Growth Factor	3.14745
	RNF13	Ring Finger Protein 13	3.14723
	MIR222	MicroRNA 222	3.14675
	PRKCG	Protein Kinase C Gamma	3.14665
	IKBKE	Inhibitor Of Nuclear Factor Kappa B Kinase Subunit Epsilon	3.14151
	MSH2	MutS Homolog 2	3.14117
	ADIPOQ	Adiponectin, C1Q And Collagen Domain Containing	3.13909
	IGF2R	Insulin Like Growth Factor 2 Receptor	3.13831
	PEG3	Paternally Expressed 3	3.13705
	MIR195	MicroRNA 195	3.13524
	MAGED1	MAGE Family Member D1	3.13313
	NFKBIB	NFKB Inhibitor Beta	3.13223
	CRP	C-Reactive Protein	3.12656
	EIF4E	Eukaryotic Translation Initiation Factor 4E	3.12648
	GRAMD4	GRAM Domain Containing 4	3.12276
	CUL1	Cullin 1	3.1219
	MIR15A	MicroRNA 15a	3.12111
	PDCD7	Programmed Cell Death 7	3.11455
	MAF	MAF BZIP Transcription Factor	3.11208
	SFPQ	Splicing Factor Proline And Glutamine Rich	3.11127
	TFDP1	Transcription Factor Dp-1	3.11079
	NME6	NME/NM23 Nucleoside Diphosphate Kinase 6	3.10984
	PPP2R2B	Protein Phosphatase 2 Regulatory Subunit Bbeta	3.1094
	PRDX5	Peroxiredoxin 5	3.10896
	AGAP2	ArfGAP With GTPase Domain, Ankyrin Repeat And PH Domain 2	3.10881
	PLAUR	Plasminogen Activator, Urokinase Receptor	3.10307
	MIR126	MicroRNA 126	3.10104
	ADA	Adenosine Deaminase	3.09877
	TGFB2	Transforming Growth Factor Beta 2	3.09439
	GZMA	Granzyme A	3.08902
	TRAF4	TNF Receptor Associated Factor 4	3.08799
	PROM1	Prominin 1	3.08786
	CALR	Calreticulin	3.08766
	ABCG2	ATP Binding Cassette Subfamily G Member 2 (Junior Blood Group)	3.08725
	TNFRSF11A	TNF Receptor Superfamily Member 11a	3.08708
	SHISA5	Shisa Family Member 5	3.08595
	RXRA	Retinoid X Receptor Alpha	3.07972
	PIN1	Peptidylprolyl Cis/Trans Isomerase, NIMA-Interacting 1	3.07842
	MECOM	MDS1 And EVI1 Complex Locus	3.07371
	JADE1	Jade Family PHD Finger 1	3.07361
	PPM1L	Protein Phosphatase, Mg2+/Mn2+ Dependent 1L	3.07276
	PTPN6	Protein Tyrosine Phosphatase Non-Receptor Type 6	3.07259
	BMI1	BMI1 Proto-Oncogene, Polycomb Ring Finger	3.06785
	TP73-AS1	TP73 Antisense RNA 1	3.06486
	CAST	Calpastatin	3.06265
	HSPA9	Heat Shock Protein Family A (Hsp70) Member 9	3.05907
	G6PD	Glucose-6-Phosphate Dehydrogenase	3.05873
	TUBA1B	Tubulin Alpha 1b	3.05689
	BCAR1	BCAR1 Scaffold Protein, Cas Family Member	3.05632
	SH3KBP1	SH3 Domain Containing Kinase Binding Protein 1	3.05631
	PRL	Prolactin	3.05544
	BEX2	Brain Expressed X-Linked 2	3.05435
	CTSL	Cathepsin L	3.05363
	SMAD3	SMAD Family Member 3	3.05298
	CYLD	CYLD Lysine 63 Deubiquitinase	3.05079
	HSD17B10	Hydroxysteroid 17-Beta Dehydrogenase 10	3.04735
	EPOR	Erythropoietin Receptor	3.04337
	BMX	BMX Non-Receptor Tyrosine Kinase	3.03931
	PARM1	Prostate Androgen-Regulated Mucin-Like Protein 1	3.02989
	TNFAIP8	TNF Alpha Induced Protein 8	3.02706
	DNTT	DNA Nucleotidylexotransferase	3.02569
	MEFV	MEFV Innate Immuity Regulator, Pyrin	3.02452
	PSMC6	Proteasome 26S Subunit, ATPase 6	3.02369
	SMPD3	Sphingomyelin Phosphodiesterase 3	3.02273
	PHB1	Prohibitin 1	3.02191
	RAD21	RAD21 Cohesin Complex Component	3.01912
	PTGS1	Prostaglandin-Endoperoxide Synthase 1	3.01794
	UBE2K	Ubiquitin Conjugating Enzyme E2 K	3.01019
	INPP5D	Inositol Polyphosphate-5-Phosphatase D	3.01007
	MIR125A	MicroRNA 125a	3.00715
	FGFR1	Fibroblast Growth Factor Receptor 1	3.00703
	FOXM1	Forkhead Box M1	3.00677
	PIK3C3	Phosphatidylinositol 3-Kinase Catalytic Subunit Type 3	3.00304
	ELAVL1	ELAV Like RNA Binding Protein 1	3.00055
	TWIST1	Twist Family BHLH Transcription Factor 1	3.00015
